# Supplementary material
Source: publisher figshare collection journal article supplement (https://acs.figshare.com/ndownloader/files/4293070)

Sulfoxide-Alkene Hybrids: A New Class of Chiral Ligands for  
the Hayashi-Miyaura Reaction

Tobias Thaler, Li-Na Guo, Andreas K. Steib, Mihai Raducan,  
Konstantin Karaghiosoff, Peter Mayer and Paul Knochel\*

Ludwig-Maximilians-Universität München, Department Chemie  
Butenandtstrasse 5-13, Haus F, 81377 München (Germany)

Fax: (+49) 089 2180 77680

e-mail: paul.knochel@cup.uni-muenchen.de

## Table of Contents

|                                                                                                                                                                                                                                                                                                                      |            |
|----------------------------------------------------------------------------------------------------------------------------------------------------------------------------------------------------------------------------------------------------------------------------------------------------------------------|------------|
| <b>General</b>                                                                                                                                                                                                                                                                                                       | <b>S3</b>  |
| <b>Synthesis of the chiral sulfoxide-alkene hybrid ligands</b>                                                                                                                                                                                                                                                       | <b>S3</b>  |
| Preparation of starting materials                                                                                                                                                                                                                                                                                    | S3         |
| Typical procedure I: Mg-insertion                                                                                                                                                                                                                                                                                    | S3         |
| Preparation of bis(4-(dimethylamino)phenyl)magnesium                                                                                                                                                                                                                                                                 | S4         |
| Preparation of 7-bromo-2-arylbicyclo[2.2.1]hept-2-enes                                                                                                                                                                                                                                                               | S5         |
| Typical Procedure 2: Preparation of (1 <i>S</i> ,4 <i>R</i> ,7 <i>S</i> )-2-aryl-7-<br>(( <i>R</i> )- <i>p</i> -tolylsulfinyl)bicyclo[2.2.1]hept-2-enes; quenching<br>with <i>Andersen</i> -sulfinat (( <i>S</i> )-(1 <i>R</i> ,2 <i>S</i> ,5 <i>R</i> )-2-isopropyl-5-<br>methylcyclohexyl 4-methylbenzenesulfinat) | S8         |
| Typical Procedure 3: Preparation of chiral sulfoxide-<br>alkene hybrid ligands using ( <i>S</i> )-TMP <sub>OO</sub> ( <i>N</i> -tosyl-phenyl-<br>methyl-1,2,3-oxathiazolidine-2-oxide)                                                                                                                               | S13        |
| Typical Procedure 4: Preparation of the chiral sulfoxide-<br>alkene hybrid/Rh catalyst                                                                                                                                                                                                                               | S18        |
| Typical Procedure 5: Enantioselective <i>Hayashi-Miyaura</i><br>reaction:                                                                                                                                                                                                                                            | S18        |
| Compounds of Table 1                                                                                                                                                                                                                                                                                                 | S19        |
| Compounds of Table 2                                                                                                                                                                                                                                                                                                 | S39        |
| Compounds of Table 3                                                                                                                                                                                                                                                                                                 | S45        |
| <b>References</b>                                                                                                                                                                                                                                                                                                    | <b>S51</b> |
| <b>NMR experiments/Rh coordination</b>                                                                                                                                                                                                                                                                               | <b>S52</b> |
| <b>X-ray data</b>                                                                                                                                                                                                                                                                                                    | <b>S53</b> |
| <b>NMR-spectra</b>                                                                                                                                                                                                                                                                                                   | <b>S56</b> |

**General**

All reactions were carried out under an argon atmosphere in flame-dried glassware. Syringes which were used to transfer anhydrous solvents or reagents were purged with argon prior to use. THF was continuously refluxed and freshly distilled from sodium benzophenone ketyl under nitrogen. 1,4-Dioxane was predried over KOH and distilled from sodium benzophenone ketyl under nitrogen. Yields refer to isolated yields of compounds estimated to be > 95 % pure as determined by  $^1\text{H}$ -NMR (25 °C) and capillary GC. Column chromatography was performed using  $\text{SiO}_2$  (0.040 - 0.063 mm, 230 - 400 mesh ASTM) from Merck if not indicated.

**Syntheses of the chiral sulfoxide-alkene hybrid ligands:****Preparation of starting materials:****Typical procedure 1: Mg-Insertion:<sup>[1]</sup>**

A dry and Ar-flushed 50 mL Schlenk-tube, equipped with a stirring bar and a septum, was charged with anhydrous LiCl (25 mmol; 1.06 g) and heated to 130 °C under high vacuum (1 mbar) for 3 h. After cooling to rt under Ar, Mg turnings (25 mmol; 608 mg), 1,2-dibromoethane (0.1 ml) and freshly distilled THF (20 mL) were added. The reaction mixture was shortly heated to reflux and was cooled to rt under Ar. Under vigorous stirring

the respective aryl bromide (20 mmol) was slowly added at the appropriate temperature. The reaction mixture was stirred under Ar overnight and was titrated by using a stoichiometric amount of iodine (50 mg) in THF (2 mL).

**(4-Methoxyphenyl)magnesium bromide:**

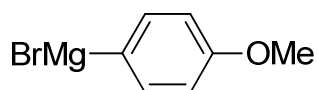

0.81 M in THF (81%); reaction temperature: 40 °C

**(4-(Trifluoromethyl)phenyl)magnesium bromide:**

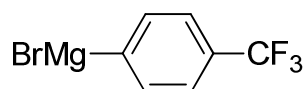

0.68 M in THF (68%); reaction temperature: 0 °C. (Caution: Mg filings (no Mg powder) must be used in order to avoid an uncontrollable reaction).

**Preparation of bis(4-(dimethylamino)phenyl)magnesium:**

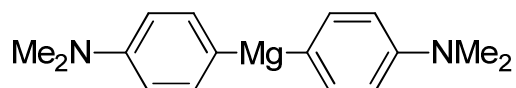

A dry and Ar-flushed 250 mL Schlenk-flask, equipped with a stirring bar and a septum, was charged with a solution of 4-bromo-*N,N*-dimethylaniline (4.0 g; 20 mmol) in 20 mL THF. The

solution was cooled to  $-78\text{ }^{\circ}\text{C}$  and  $t\text{BuLi}$  (1.89 M in  $n$ -pentane; 21.2 mL; 40 mmol) was added dropwise via syringe. The reaction mixture was stirred for 1.5 h at  $-78\text{ }^{\circ}\text{C}$ , before  $\text{MgCl}_2$  (0.5 M in THF; 20 mL; 10 mmol) was added. The mixture was allowed to reach room temperature. The resulting solution was titrated by using a stoichiometric amount of iodine (50 mg) in THF (2 mL) indicating a concentration of 0.31 M (62%).

#### **Preparation of 7-bromo-2-arylbicyclo[2.2.1]hept-2-enes:**

A dry and Ar-flushed 500 mL Schlenk-flask, equipped with a stirring bar and a septum, was charged with 7-bromobicyclo[2.2.1]heptan-2-one (3.77 g; 20 mmol) and a solution of  $\text{LaCl}_3 \cdot 2\text{ LiCl}$  in THF (0.33 M; 90 mL; 30 mmol).<sup>[2]</sup> The mixture was stirred at rt for 1 h. Then, the solution was cooled to  $-78\text{ }^{\circ}\text{C}$  and a solution of the respective arylmagnesium reagent (30 mmol) was added dropwise. After stirring for 1 h at  $-78\text{ }^{\circ}\text{C}$ , the cold bath was removed and the mixture was allowed to reach rt within 1 h. The reaction mixture was further stirred for 2 h at room temperature. It was then cooled to  $-78\text{ }^{\circ}\text{C}$  and methanesulfonic acid (4.68 mL; 72 mmol) was added dropwise and the mixture was allowed to reach rt. After 1.5 h, the clear yellow solution was quenched with  $\text{NEt}_3$  (9.9 mL; 72 mmol). The mixture was filtrated and the precipitate was washed with  $\text{Et}_2\text{O}$  (3x).  $\text{NH}_4\text{Cl}$  sat. solution (250 mL) was added to the filtrate. Phases were separated and the

aqueous phase was extracted with Et<sub>2</sub>O (3x 100 mL). The recombined organic phases were dried over Na<sub>2</sub>SO<sub>4</sub> and the solvents were evaporated. The crude product was subjected to column-chromatographic purification.

**7-Bromo-2-(4-methoxyphenyl)bicyclo[2.2.1]hept-2-ene (5):**

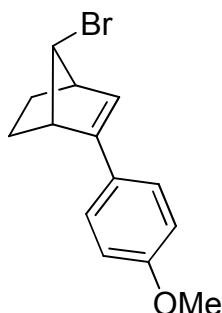

**yellow oil (67%)**

**<sup>1</sup>H-NMR (300 MHz, CDCl<sub>3</sub>)**  $\delta$ : 7.40 (d,  $J$ =8.8 Hz, 2 H), 6.89 (d,  $J$ =8.8 Hz, 2 H), 6.16 (d,  $J$ =2.9 Hz, 1 H), 4.02 (d,  $J$ =0.7 Hz, 1 H), 3.82 (s, 3 H), 3.44 (d,  $J$ =1.0 Hz, 1 H), 3.17 (br. s., 1 H), 2.00 – 1.85 (m, 2 H), 1.38 – 1.21 (m, 2 H).

**<sup>13</sup>C-NMR (75 MHz, CDCl<sub>3</sub>)**  $\delta$ : 159.1, 144.9, 127.7, 126.5, 124.1, 114.0, 65.2, 55.3, 50.9, 50.5, 25.0, 23.0.

**MS (70 eV, EI)**  $m/z$  (%): 278 (6) [M<sup>+</sup>], 200 (5), 199 (39), 172 (12), 171 (100), 156 (5), 128 (8), 121 (4).

**IR (ATR)  $\tilde{\nu}$  (cm<sup>-1</sup>):** 1678 (s), 1610 (s), 1598 (vs), 1570 (s), 1506 (vs), 1306 (s), 1294 (s), 1248 (vs), 1222 (s), 1176 (vs), 1036 (s), 868 (s), 838 (s), 804 (vs), 788 (s), 750 (s), 702 (s), 608 (s).

**HRMS (EI)** for C<sub>14</sub>H<sub>15</sub>BrO (278.0306): 278.0297.

**4-(7-bromobicyclo[2.2.1]hept-2-en-2-yl)-*N,N*-dimethylaniline:**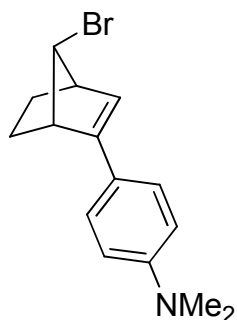

**slightly red solid (71%)**

**m.p.:** 100.4 – 101.3 °C.

**<sup>1</sup>H-NMR (400 MHz, C<sub>6</sub>D<sub>6</sub>)** δ: 7.36 (d, *J*=9.0 Hz, 2 H), 6.57 (d, *J*=9.0 Hz, 2 H), 5.97 (d, *J*=2.9 Hz, 1 H), 3.68 (s, 1 H), 3.29 (d, *J*=1.2 Hz, 1 H), 2.90 (br. s., 1 H), 2.51 (s, 6 H), 1.50 – 1.36 (m, 2 H), 1.07 – 0.95 (m, 2 H).

**<sup>13</sup>C-NMR (101 MHz, C<sub>6</sub>D<sub>6</sub>)** δ: 150.7, 146.2, 127.1, 124.4, 122.3, 113.2, 65.8, 51.5, 51.1, 40.5, 25.8, 23.6.

**MS (70 eV, EI)** *m/z* (%): 291 (8) [M<sup>+</sup>], 213 (5), 212 (29), 185 (15), 184 (100), 183 (4), 168 (10), 139 (6), 115 (5), 92 (7), 91 (7), 58 (12), 43 (35).

**IR (ATR)  $\tilde{\nu}$  (cm<sup>-1</sup>):** 2970 (m), 2942 (m), 2870 (m), 2800 (w), 1612 (vs), 1520 (vs), 1480 (m), 1460 (m), 1444 (m), 1364 (s), 1340 (m), 1298 (m), 1284 (w), 1230 (s), 1198 (s), 1188 (s), 1172 (m), 1160 (m), 1116 (s), 1064 (m), 946 (m), 866 (w), 824 (m), 806 (s), 794 (s), 786 (vs), 746 (s), 720 (m), 700 (m).

**HRMS (EI)** for C<sub>15</sub>H<sub>18</sub>BrN (291.0623): 291.0603.

**Typical Procedure 2: Preparation of (1*S*,4*R*,7*S*)-2-aryl-7-((*R*)-*p*-tolylsulfinyl)bicyclo[2.2.1]hept-2-enes; quenching with Andersen-sulfinate<sup>[3]</sup> ((*S*)-(1*R*,2*S*,5*R*)-2-isopropyl-5-methyl-cyclohexyl 4-methylbenzenesulfinate):**

A dry and Ar-flushed 250 mL Schlenk-flask, equipped with a stirring bar and a septum, was charged with a solution of the respective 7-bromo-2-arylbicyclo[2.2.1]hept-2-ene (8 mmol) in THF (16 mL) and cooled to -78 °C. *t*BuLi (1.89 M in *n*-pentane; 9.31 mL; 17.6 mmol) was slowly added via syringe and the mixture was stirred for 2 h. A solution of MgCl<sub>2</sub> in THF (0.5 M; 18 mL; 9 mmol) was added and the mixture was further stirred at -78 °C for 30 min before a solution of the Andersen sulfinate<sup>[3]</sup> (2.65 g; 9 mmol) in THF (9 mL) was added dropwise. After 4 h at -78 °C the reaction mixture was allowed to slowly reach rt. H<sub>2</sub>O (100 mL) was added. Phases were separated and the aqueous phase was extracted with CH<sub>2</sub>Cl<sub>2</sub> (3x 50 mL). The recombined phases were washed with brine (50 mL) and dried over Na<sub>2</sub>SO<sub>4</sub>. The solvents were evaporated and the crude product was subjected to column chromatography yielding the pure diastereomeric chiral sulfoxides.



(1*R*,4*S*,7*R*)-2-(4-Methoxyphenyl)-7-((*R*)-*p*-tolylsulfinyl)-bicyclo[2.2.1]hept-2-ene (1) and (1*S*,4*R*,7*S*)-2-(4-methoxyphenyl)-7-((*R*)-*p*-tolylsulfinyl)-bicyclo[2.2.1]hept-2-ene (2):

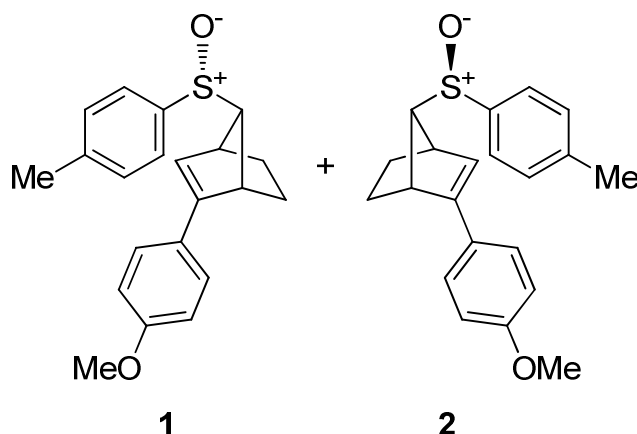

Flash column chromatography: purification/separation of the diastereomeric sulfoxide ligands from byproducts: (a) SiO<sub>2</sub>, *n*-pentane : acetone 2 :1; separation of the two diastereomeric sulfoxide ligands: (b) SiO<sub>2</sub>, CH<sub>2</sub>Cl<sub>2</sub>:EtOAc 2:1.

**1: white solid (35%)**

**m.p.:** 213.1 – 214.2 °C.

**<sup>1</sup>H-NMR (300 MHz, C<sub>6</sub>D<sub>6</sub>)** δ: 7.61 (d, *J*=8.0 Hz, 2 H), 7.39 (d, *J*=8.8 Hz, 2 H), 6.95 (d, *J*=7.8 Hz, 2 H), 6.79 (d, *J*=8.8 Hz, 2 H), 5.96 (d, *J*=2.7 Hz, 1 H), 4.07 (d, *J*=1.9 Hz, 1 H), 3.32 (s, 3 H), 2.77 (s, 1 H), 2.45 (br. s., 1 H), 2.01 (s, 3 H), 1.56 – 1.45 (m, 1 H), 1.31 – 1.21 (m, 1 H), 1.12 – 1.03 (m, 1 H), 0.97 – 0.88 (m, 1 H).

**<sup>13</sup>C-NMR (75 MHz, C<sub>6</sub>D<sub>6</sub>)** δ: 160.4, 146.4, 144.7, 141.0, 130.2, 127.9, 127.7, 125.0, 124.5, 114.8, 88.0, 55.2, 46.5, 45.4, 27.7, 25.0, 21.5.

**MS (70 eV, EI)**  $m/z$  (%): 338 (6) [ $M^+$ ], 323 (9), 322 (37), 294 (6), 200 (16), 199 (100), 198 (22), 185 (7), 184 (11), 172 (10), 171 (72), 156 (7), 135 (8), 128 (10), 121 (13), 67 (6).

**IR (ATR)**  $\tilde{\nu}$  ( $\text{cm}^{-1}$ ): 2974 (w), 2926 (w), 1610 (w), 1594 (w), 1506 (m), 1490 (m), 1466 (m), 1456 (w), 1442 (w), 1296 (w), 1272 (w), 1258 (m), 1246 (m), 1222 (m), 1184 (w), 1176 (m), 1120 (w), 1110 (w), 1080 (m), 1030 (vs), 1012 (s), 992 (m), 972 (w), 840 (m), 828 (w), 808 (s), 800 (s).

**HRMS (EI)** for  $\text{C}_{21}\text{H}_{22}\text{O}_2\text{S}$  (338.1340): 338.1344.

**2: white solid (37%)**

**m.p.:** 173.5 – 174.5 °C.

**$^1\text{H}$ -NMR (300 MHz,  $\text{C}_6\text{D}_6$ )**  $\delta$ : 7.57 (d,  $J=8.0$  Hz, 2 H), 7.20 (d,  $J=8.8$  Hz, 2 H), 6.89 (d,  $J=8.0$  Hz, 2 H), 6.80 (d,  $J=8.8$  Hz, 2 H), 6.07 (d,  $J=2.9$  Hz, 1 H), 3.66 (br. s., 1 H), 3.33 (s, 3 H), 2.87 – 2.71 (m, 2 H), 1.98 (s, 3 H), 1.60 – 1.49 (m, 1 H), 1.28 – 1.17 (m, 1 H), 1.10 – 1.01 (m, 1 H), 0.94 – 0.84 (m, 1 H).

**$^{13}\text{C}$ -NMR (75 MHz,  $\text{C}_6\text{D}_6$ )**  $\delta$ : 160.2, 146.0, 144.6, 141.1, 130.2, 127.9, 127.1, 125.3, 124.9, 114.8, 88.3, 55.2, 46.3, 45.8, 27.3, 25.6, 21.5.

**MS (70 eV, EI)**  $m/z$  (%): 338 (19) [ $M^+$ ], 322 (25), 200 (10), 199 (68), 198 (15), 184 (12), 172 (14), 171 (100), 156 (10), 135 (28), 128 (15), 121 (18).

**IR (ATR)**  $\tilde{\nu}$  ( $\text{cm}^{-1}$ ): 2982 (vw), 2934 (w), 1612 (w), 1598 (w), 1572 (w), 1508 (m), 1492 (w), 1464 (w), 1446 (w), 1416 (w),

1294 (w), 1276 (w), 1246 (s), 1222 (w), 1210 (w), 1194 (w),  
1182 (m), 1124 (w), 1110 (w), 1082 (w), 1030 (vs), 1014 (m),  
990 (w), 964 (w), 950 (w), 842 (w), 814 (s), 794 (s), 704 (w).

HRMS (EI) for C<sub>21</sub>H<sub>22</sub>O<sub>2</sub>S (338.1340): 338.1325.

HPLC Data:

Chiralcel AD; *n*-heptane : *i*-propanol 80:20; flow: 0.3 mL/min

1:

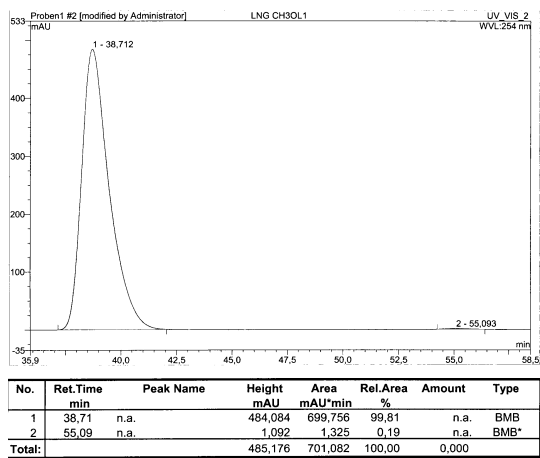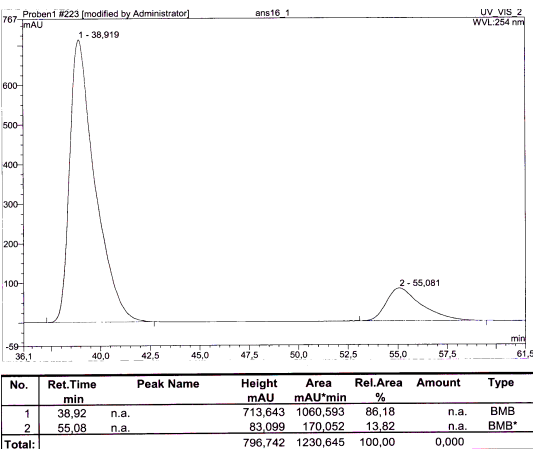

without transmetalation to MgCl<sub>2</sub> (72% ee)

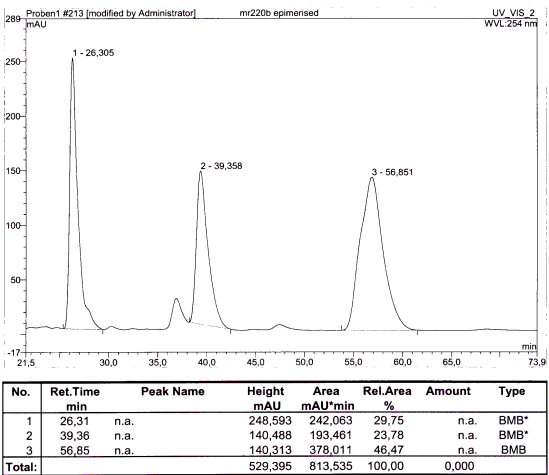

after acidic epimerization of 1 (HCl

1 M in CH<sub>2</sub>Cl<sub>2</sub>)

shows 1, 2 and their enantiomers

2:

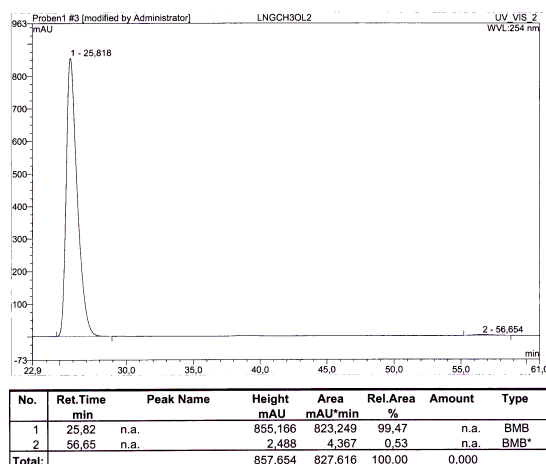

*N,N*-Dimethyl-4-((1*R*,4*S*,7*R*)-7-((*R*)-*p*-tolylsulfinyl)bicyclo-[2.2.1]hept-2-en-2-yl)aniline (16):

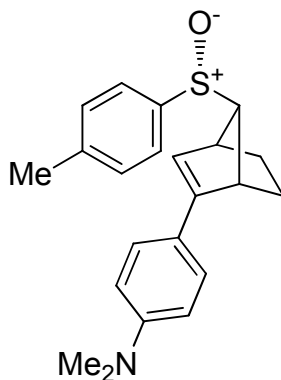

white solid (28%; only one diastereomer isolated)

m.p.: 224.7 – 226.9 °C.

<sup>1</sup>H-NMR (400 MHz, d<sup>8</sup>-THF) δ: 7.50 (d, *J*=8.2 Hz, 2 H), 7.37 (d, *J*=8.8 Hz, 2 H), 7.31 (d, *J*=7.8 Hz, 2 H), 6.70 (d, *J*=9.0 Hz, 2 H), 6.11 (d, *J*=2.5 Hz, 1 H), 3.84 (d, *J*=2.0 Hz, 1 H), 2.94 (s, 6 H), 2.64 (s, 2 H), 2.38 (s, 3 H), 1.91 – 1.80 (m, 1 H), 1.79 – 1.73 (m, 1 H), 1.28 – 1.16 (m, 2 H).

**$^{13}\text{C}$ -NMR (101 MHz,  $\text{d}^8\text{-THF}$ )  $\delta$ :** 151.3, 146.9, 145.2, 141.4, 130.3, 127.2, 125.0, 123.9, 122.6, 113.1, 88.2, 46.4, 45.6, 40.6, 30.7, 28.3, 21.4.

**MS (70 eV, EI)  $m/z$  (%):** 351 (5) [ $\text{M}^+$ ], 212 (18), 184 (47), 168 (9), 148 (19), 91 (9), 67 (9), 58 (27), 43 (100).

**IR (ATR)  $\tilde{\nu}$  ( $\text{cm}^{-1}$ ):** 2924 (w), 2866 (w), 1612 (m), 1520 (m), 1492 (m), 1460 (w), 1444 (w), 1364 (m), 1274 (w), 1234 (w), 1218 (w), 1200 (m), 1190 (m), 1178 (w), 1116 (w), 1078 (m), 1032 (vs), 1014 (m), 976 (w), 952 (w), 868 (w), 826 (m), 812 (s), 794 (vs), 706 (w).

**HRMS (EI) for  $\text{C}_{22}\text{H}_{25}\text{NOS}$  (351.1657):** 351.1644.

**Typical Procedure 3: Preparation of chiral sulfoxide-alkene hybrid ligands using (*S*)-TMPOO<sup>[4]</sup> (*N*-tosyl-phenyl-methyl-1,2,3-oxathiazolidine-2-oxide):**

A dry and Ar-flushed 50 mL Schlenk-tube, equipped with a stirring bar and a septum, was charged with a solution of the 7-bromo-2-(4-methoxyphenyl)bicyclo[2.2.1]hept-2-ene (0.838 g; 3 mmol) in THF (6 mL) and cooled to  $-78\text{ }^{\circ}\text{C}$ . *t*BuLi (1.89 M in *n*-pentane; 3.49 mL; 6.6 mmol) was slowly added via syringe and the mixture was stirred for 2 h. A solution of  $\text{MgCl}_2$  in THF (0.5 M; 13.2 mL; 6.6 mmol) was added. Meanwhile, a dry and Ar-flushed 100 mL Schlenk-flask, equipped with a stirring bar and a septum, was charged with solution of (*S*)-TMPOO<sup>[4]</sup> (1.11 g; 3.15 mmol) in THF (8.4 mL) and cooled to  $-78\text{ }^{\circ}\text{C}$ . The cold

Grignard reagent, which was further kept at  $-78\text{ }^{\circ}\text{C}$  was transferred to the (*S*)-TMPPO solution dropwise using a Teflon-cannula. After the addition was finished, the reaction mixture was stirred for further 2 h before the respective second Grignard reagent (3.3 mmol) was added. The reaction mixture was stirred for 1.5 h at  $-78\text{ }^{\circ}\text{C}$  and was then allowed to warm to room temperature. The reaction was quenched with  $\text{NaHCO}_3$  sat. solution (8 mL).  $\text{H}_2\text{O}$  (20 mL) was added and phases were separated. The aqueous phase was extracted with EtOAc (3x 40 mL). The combined organic layers were washed with brine (50 mL) and dried over  $\text{Na}_2\text{SO}_4$ . The solvents were evaporated and the crude products were subjected to column chromatography yielding the respective pure diastereomeric chiral sulfoxide.

**(1*S*,4*R*,7*S*)-2-(4-methoxyphenyl)-7-((*S*)-(4-methoxyphenyl)-sulfinyl)bicyclo[2.2.1]hept-2-ene (15a):**

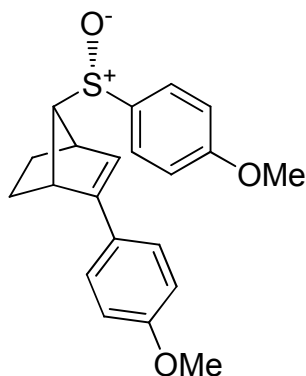

**white solid (31%; only one diastereomer isolated)**

**m.p.:** 184.8 – 186.2  $^{\circ}\text{C}$ .

**$^1\text{H-NMR}$  (400 MHz,  $\text{C}_6\text{D}_6$ )  $\delta$ :** 7.55 (d,  $J=8.8\text{ Hz}$ , 2 H), 7.34 (d,  $J=8.8\text{ Hz}$ , 2 H), 6.74 (d,  $J=8.8\text{ Hz}$ , 2 H), 6.69 (d,  $J=8.8\text{ Hz}$ , 2 H), 5.92 (d,  $J=2.7\text{ Hz}$ , 1 H), 4.01 (d,  $J=1.8\text{ Hz}$ , 1 H), 3.28 (s,

3 H) , 3.16 (s, 3 H), 2.73 (s, 1 H), 2.38 (br. s., 1 H), 1.56 – 1.45 (m, 1 H), 1.30 – 1.21 (m, 1 H), 1.08 – 1.00 (m, 1 H), 0.94 – 0.85 (m, 1 H).

$^{13}\text{C}$ -NMR (101 MHz,  $\text{C}_6\text{D}_6$ )  $\delta$ : 161.5, 159.6, 145.7, 137.9, 127.2, 126.9, 125.9, 123.8, 114.4, 114.1, 87.5, 54.6, 54.5, 45.8, 44.7, 27.0, 24.4.

MS (70 eV, EI)  $m/z$  (%): 354 (4) [ $\text{M}^+$ ], 338 (26), 200 (16), 199 (100), 198 (18), 197 (11), 184 (13), 172 (14), 171 (89), 156 (10), 155 (10), 135 (12), 128 (17), 121 (23), 91 (19), 67 (22).

IR (ATR)  $\tilde{\nu}$  ( $\text{cm}^{-1}$ ): 2967 (w), 2945 (vw), 1594 (m), 1577 (w), 1508 (m), 1493 (m), 1307 (w), 1295 (w), 1245 (s), 1176 (m), 1084 (m), 1027 (vs), 1009 (m), 1004 (m), 993 (m), 838 (m), 823 (s), 817 (m), 802 (s), 796 (m), 789 (m), 616 (w), 609 (m).

HRMS (EI) for  $\text{C}_{21}\text{H}_{22}\text{O}_3\text{S}$  (354.1290): 354.1282.

(1S,4R,7S)-2-(4-methoxyphenyl)-7-((S)-(4-(trifluoromethyl)-phenyl)sulfinyl)bicyclo[2.2.1]hept-2-ene (15b):

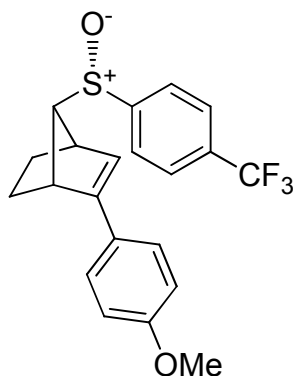

white solid (19%; only one diastereomer isolated)

m.p.: 151.6 – 152.6 °C.

**$^1\text{H}$ -NMR (300 MHz,  $\text{C}_6\text{D}_6$ )**  $\delta$ : 7.47 (d,  $J=8.0$  Hz, 2 H), 7.38 (d,  $J=8.8$  Hz, 2 H), 7.30 (d,  $J=8.3$  Hz, 2 H), 6.80 (d,  $J=8.8$  Hz, 2 H), 5.92 (d,  $J=2.7$  Hz, 1 H), 3.99 (d,  $J=1.7$  Hz, 1 H), 3.33 (s, 3 H), 2.60 (s, 1 H), 2.30 (br. s., 1 H), 1.53 – 1.42 (m, 1 H), 1.29 – 1.19 (m, 1 H), 1.10 – 1.02 (m, 1 H), 0.97 – 0.88 (m, 1 H).

**$^{13}\text{C}$ -NMR (75 MHz,  $\text{C}_6\text{D}_6$ )**  $\delta$ : 160.5, 152.1 (d,  $J=1.3$  Hz), 146.4, 132.7 (q,  $J=32.5$  Hz), 127.7, 127.6, 126.3 (q,  $J=3.6$  Hz), 125.3, 124.8 (q,  $J=272.9$  Hz), 124.2, 114.9, 87.6, 55.2, 46.6, 45.2, 27.7, 24.8.

**MS (70 eV, EI)**  $m/z$  (%): 392 (13) [ $\text{M}^+$ ], 376 (22), 199 (56), 184 (10), 172 (13), 171 (100), 135 (33), 128 (13), 121 (14).

**IR (ATR)  $\tilde{\nu}$  ( $\text{cm}^{-1}$ ):** 2974 (w), 2960 (w), 2936 (w), 1606 (w), 1596 (w), 1508 (s), 1468 (w), 1458 (w), 1400 (w), 1332 (s), 1306 (m), 1296 (s), 1274 (m), 1258 (m), 1248 (s), 1220 (m), 1174 (s), 1162 (s), 1150 (s), 1122 (vs), 1102 (s), 1084 (m), 1062 (s), 1042 (vs), 1028 (vs), 1012 (s), 974 (m), 870 (w), 832 (s), 818 (m), 804 (s), 712 (w), 702 (m), 610 (w).

**HRMS (EI)** for  $\text{C}_{21}\text{H}_{19}\text{F}_3\text{O}_2\text{S}$  (392.1058): 392.1060.



(1S,4R,7S)-7-((S)-tert-butylsulfinyl)-2-(4-methoxyphenyl)-  
bicyclo[2.2.1]hept-2-ene (15c):

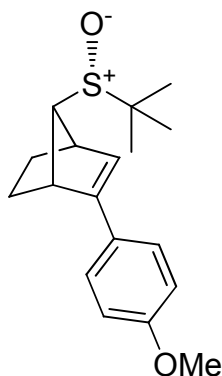

white solid (17%; only one diastereomer isolated)

m.p.: 105.4 – 106.6 °C.

$^1\text{H-NMR}$  (400 MHz,  $\text{C}_6\text{D}_6$ )  $\delta$ : 7.45 (d,  $J=8.8$  Hz, 2 H), 6.76 (d,  $J=8.8$  Hz, 2 H), 5.95 (d,  $J=2.9$  Hz, 1 H), 3.94 (br. s., 1 H), 3.31 (s, 3 H), 2.70 (s, 1 H), 2.61 (br. s., 1 H), 1.66 – 1.51 (m, 2 H), 1.20 – 1.07 (m, 2 H), 1.02 (s, 9 H).

$^{13}\text{C-NMR}$  (101 MHz,  $\text{C}_6\text{D}_6$ )  $\delta$ : 160.3, 146.6, 128.0, 128.0, 123.9, 114.7, 75.9, 55.2, 52.7, 46.6, 46.5, 28.6, 24.0, 23.5.

**MS** (70 eV, EI)  $m/z$  (%): 304 (9) [ $\text{M}^+$ ], 249 (10), 248 (65), 231 (14), 200 (21), 199 (100), 198 (20), 197 (33), 185 (38), 184 (10), 172 (35), 171 (98), 156 (12), 153 (10), 150 (25), 135 (23), 128 (21), 121 (11), 57 (14).

**IR** (ATR)  $\tilde{\nu}$  ( $\text{cm}^{-1}$ ): 2944 (w), 2872 (vw), 1612 (vw), 1598 (w), 1510 (m), 1464 (w), 1446 (w), 1364 (w), 1296 (w), 1274 (w), 1262 (w), 1244 (m), 1224 (w), 1186 (m), 1126 (w), 1026 (vs), 994 (w), 878 (w), 846 (m), 816 (s), 804 (m), 786 (w).

**HRMS** (EI) for  $\text{C}_{18}\text{H}_{24}\text{O}_2\text{S}$  (304.1497): 304.1493.

**Typical Procedure 4: Preparation of the chiral sulfoxide-alkene hybrid/Rh catalyst:**

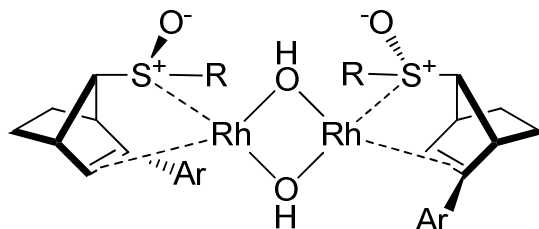

An Ar-flushed 10 mL Schlenk-tube, equipped with a stirring bar and a septum, was charged with a solution of the respective chiral sulfoxide-alkene ligand (200  $\mu\text{mol}$ ) and  $[\text{Rh}(\text{coe})_2\text{Cl}]_2$ <sup>[5]</sup> (72 mg; 100  $\mu\text{mol}$ ) in 1,4-dioxane (2 mL).  $\text{CsOH}\cdot\text{H}_2\text{O}$  (34 mg; 200  $\mu\text{mol}$ ) along with 0.8 mL  $\text{H}_2\text{O}$  (HPLC grade) was added. The resulting suspension was stirred overnight at room temperature. The next day, a clear yellow solution had formed.

**Typical Procedure 5: Enantioselective Hayashi-Miyaura reaction:**

An Ar-flushed 10 mL Schlenk-tube, equipped with a stirring bar and a septum, was charged with a solution of the respective electron-deficient alkene (0.5 mmol), the corresponding boronic acid (0.6 mmol) and  $\text{CsF}$  (0.6 mmol) in 1,4-dioxane (1.5 mL). A solution of the catalyst in 1,4-dioxane (0.036 M; 0.35 mL; 12.5  $\mu\text{mol}$ ) was slowly added to the reaction mixture. After the addition was complete, the mixture was warmed to

room temperature. Progress of the reaction was followed via TLC analysis. After all the starting material was consumed, Et<sub>2</sub>O (6 mL) was added to the reaction mixture along with SiO<sub>2</sub>. The solvents were removed and the product was subjected to column chromatography.

#### Compounds of Table 1:

##### (*S*)-3-(2-Ethylphenyl)cyclohexanone (8b):

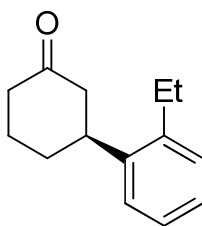

colorless oil 0.100 g (99%)

<sup>1</sup>H-NMR (400 MHz, C<sub>6</sub>D<sub>6</sub>) δ: 7.14 – 7.04 (m, 2 H), 7.04 – 6.93 (m, 2 H), 3.02 – 2.93 (m, 1 H), 2.48 – 2.42 (m, 1 H), 2.37 (q, *J*=7.5 Hz, 2 H), 2.29 – 2.23 (m, 1 H), 2.15 (t, *J*=13.4 Hz, 1 H), 1.88 (td, *J*<sub>1</sub>=13.3 Hz, *J*<sub>2</sub>= 6.0 Hz, 1 H), 1.62 – 1.52 (m, 2 H), 1.42 – 1.22 (m, 2 H), 0.99 (t, *J*=7.6 Hz, 3 H).

<sup>13</sup>C-NMR (101 MHz, C<sub>6</sub>D<sub>6</sub>) δ: 207.8, 141.9, 140.7, 128.8, 126.4, 126.2, 125.5, 48.7, 40.8, 39.4, 32.5, 25.5, 25.4, 15.6.

MS (70 eV, EI) *m/z* (%): 202 (86) [M<sup>+</sup>], 173 (33), 160 (12), 159 (100), 145 (45), 145 (32), 132 (12), 131 (17), 129 (14), 128 (10), 118 (12), 117 (54), 115 (20), 91 (11).

**IR (ATR)  $\tilde{\nu}$  ( $\text{cm}^{-1}$ ):** 2962 (m), 2934 (m), 2872 (w), 1708 (vs), 1490 (w), 1448 (m), 1420 (w), 1374 (w), 1364 (w), 1344 (w), 1314 (w), 1286 (w), 1252 (w), 1222 (m), 1182 (w), 1052 (w), 1032 (w), 972 (w), 914 (vw), 884 (vw), 796 (w), 788 (w), 752 (s), 714 (w), 650 (w).

**HRMS (EI) for  $\text{C}_{14}\text{H}_{18}\text{O}$  (202.1358):** 202.1346.

**HPLC Data:** Chiralcel OD-H; *n*-heptane : *i*-propanol 99:1; flow: 0.3 mL/min

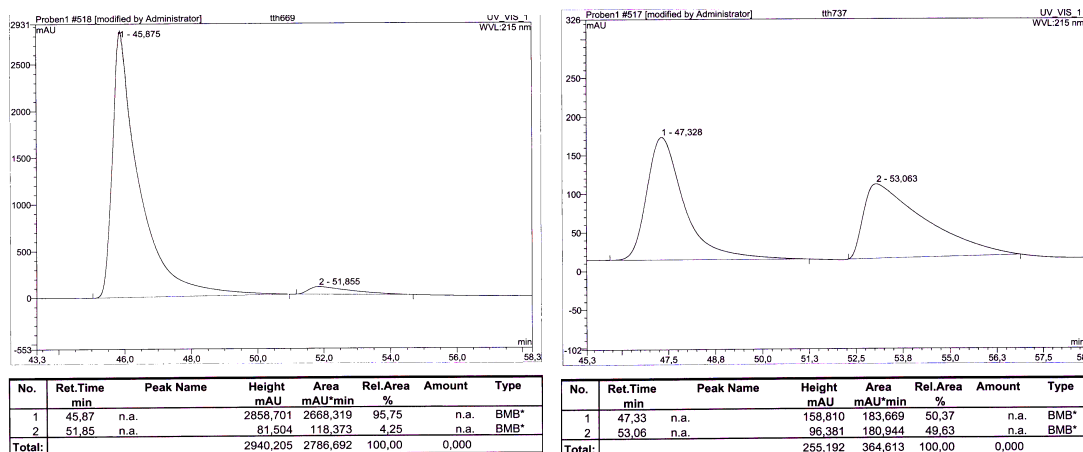

**(S)-3-(Benzo[d][1,3]dioxol-4-yl)cyclohexanone (8f):**

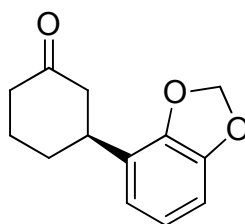

**colorless crystals 0.094 g (86%)**

**m.p.:** 78.8 – 79.9 °C.

**$^1\text{H-NMR}$  (300 MHz,  $\text{CDCl}_3$ )  $\delta$ :** 6.83 – 6.69 (m, 2 H), 6.69 – 6.58 (m, 1 H), 5.93 (s, 2 H), 3.01 – 2.84 (m, 1 H), 2.60 – 2.29 (m, 4 H), 2.20 – 1.97 (m, 2 H), 1.86 – 1.65 (m, 2 H).

$^{13}\text{C}$ -NMR (75 MHz,  $\text{CDCl}_3$ )  $\delta$ : 210.7, 147.8, 146.1, 138.4, 119.4, 108.2, 106.9, 100.9, 49.2, 44.4, 41.0, 33.0, 25.3.

MS (70 eV, EI)  $m/z$  (%): 218 (100) [ $\text{M}^+$ ], 175 (14), 162 (10), 161 (57), 148 (36), 147 (14), 135 (22), 103 (11), 89 (10).

IR (ATR)  $\tilde{\nu}$  ( $\text{cm}^{-1}$ ): 2956 (m), 2918 (m), 2852 (m), 1702 (vs), 1608 (w), 1504 (s), 1486 (s), 1440 (s), 1414 (m), 1350 (w), 1250 (m), 1218 (vs), 1188 (s), 1090 (m), 1030 (vs), 974 (m), 928 (vs), 902 (m), 874 (s), 860 (m), 810 (vs), 774 (m), 748 (m).

HRMS (EI) for  $\text{C}_{13}\text{H}_{14}\text{O}_3$  (218.0943): 218.0952.

#### HPLC Data:

Chiralcel AS-H; *n*-heptane : *i*-propanol 80:20; flow: 1.0 mL/min

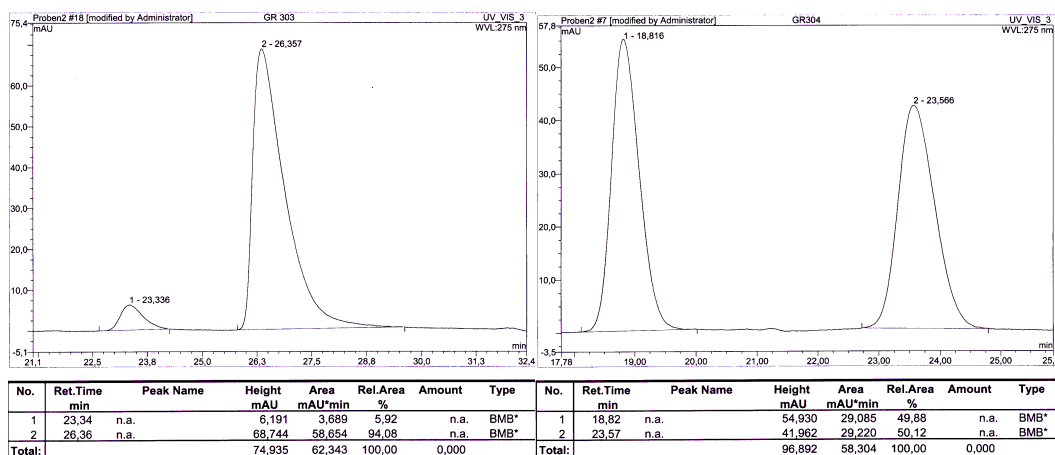

(*S*)-3-(4-Phenoxyphenyl)cyclohexanone (8j):

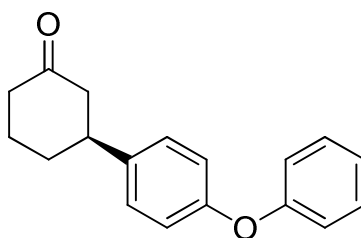

colorless crystals 0.120 g (90%)

**m.p.:** 99.3 – 100.5 °C.

**<sup>1</sup>H-NMR (300 MHz, CDCl<sub>3</sub>)**  $\delta$ : 7.34 (t,  $J$ =8.0 Hz, 2 H), 7.19 (d,  $J$ =8.4 Hz, 2 H), 7.11 (t,  $J$ =7.4 Hz, 1 H), 7.02 (d,  $J$ =7.9 Hz, 2 H), 6.98 (d,  $J$ =8.6 Hz, 2 H), 3.01 (dddd,  $J_1$ =15.5 Hz,  $J_2$ =7.8 Hz,  $J_3$ =3.8 Hz,  $J_4$ =3.7 Hz, 1 H), 2.66 – 2.32 (m, 4 H), 2.24 – 2.03 (m, 2 H), 1.92 – 1.70 (m, 2 H).

**<sup>13</sup>C-NMR (75 MHz, CDCl<sub>3</sub>)**  $\delta$ : 210.8, 157.2, 155.8, 139.2, 129.7, 127.7, 123.2, 118.9, 118.8, 49.0, 44.0, 41.1, 32.9, 25.4.

**MS (70 eV, EI)  $m/z$  (%):** 266 (100) [ $M^+$ ], 223 (16), 210 (11), 209 (79), 196 (25), 183 (12), 116 (22), 115 (27), 97 (14), 85 (16), 83 (11), 77 (16), 71 (24), 69 (14), 57 (32), 43 (14).

**IR (ATR)  $\tilde{\nu}$  (cm<sup>-1</sup>):** 2944 (w), 2922 (w), 1702 (s), 1588 (m), 1504 (s), 1486 (s), 1456 (m), 1446 (m), 1422 (w), 1366 (w), 1250 (s), 1234 (vs), 1222 (vs), 1198 (s), 1180 (m), 1166 (m), 1110 (w), 1068 (w), 910 (w), 870 (m), 828 (m), 802 (m), 784 (m), 752 (m), 738 (m), 694 (s).

**HRMS (EI) for C<sub>18</sub>H<sub>18</sub>O<sub>2</sub> (266.1307):** 266.1296.

#### HPLC Data:

Chiralcel AS-H; *n*-heptane : *i*-propanol 80:20; flow: 1.0 mL/min

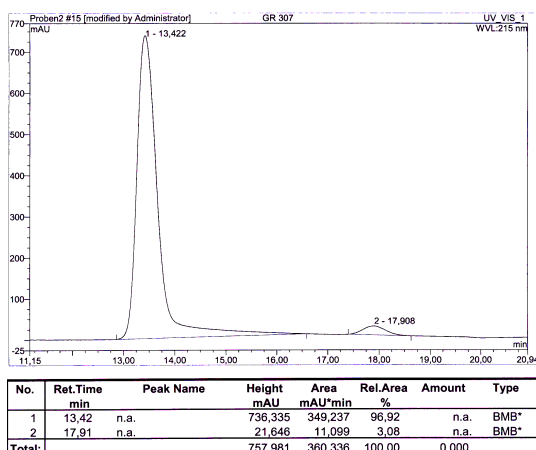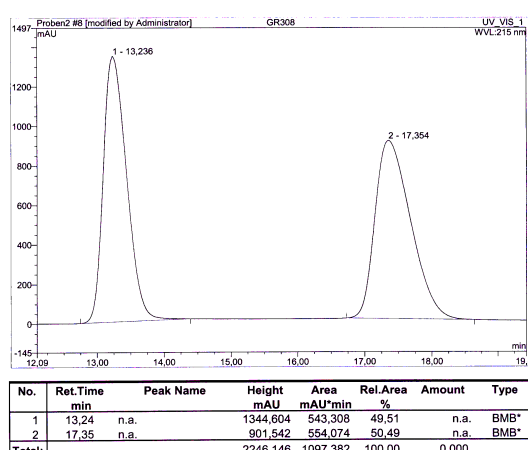

Compounds known in the literature (references [3], [4], [7], [8] and [9] in the manuscript):

(*S*)-3-Phenylcyclohexanone (8a):

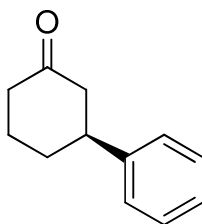

HPLC Data:

Chiralcel AD; *n*-heptane : *i*-propanol 90:10; flow: 0.3 mL/min

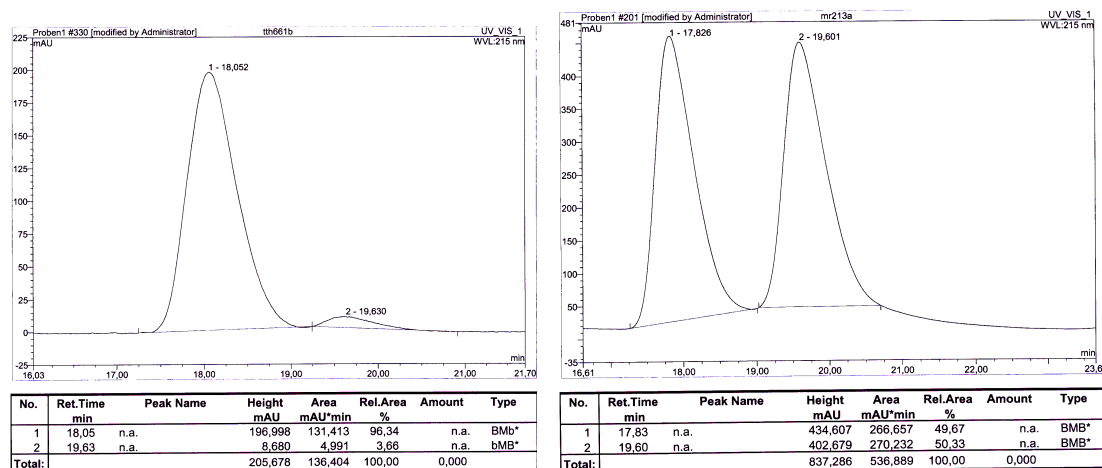

(*S*)-3-(Naphthalen-1-yl)cyclohexanone (8c):

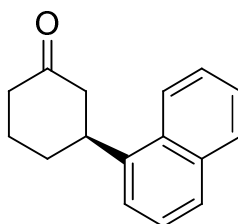

HPLC Data:

Chiralcel OD-H; *n*-heptane : *i*-propanol 95:5; flow: 0.5 mL/min

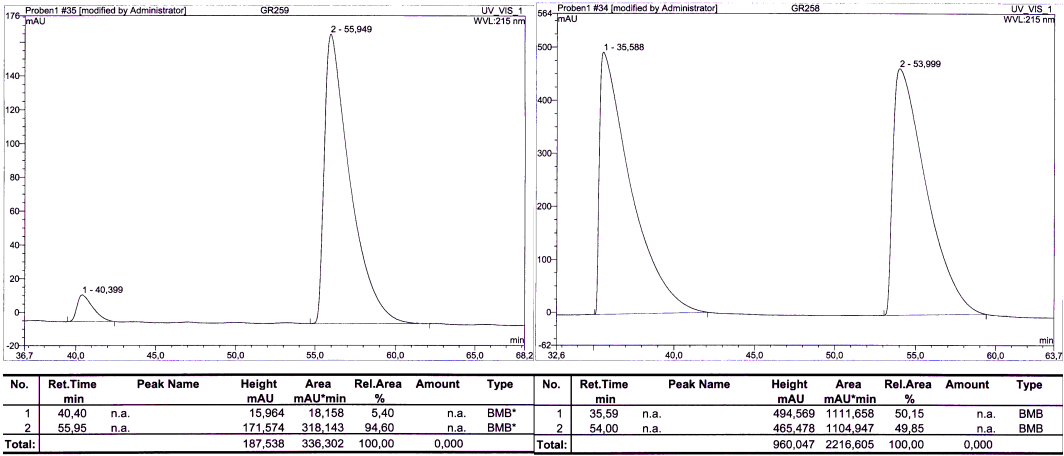

(S)-3-(2-Methoxyphenyl)cyclohexanone (8d):

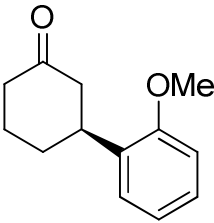

HPLC Data:

Chiralcel OD-H; *n*-heptane : *i*-propanol 95:5; flow: 0.5 mL/min

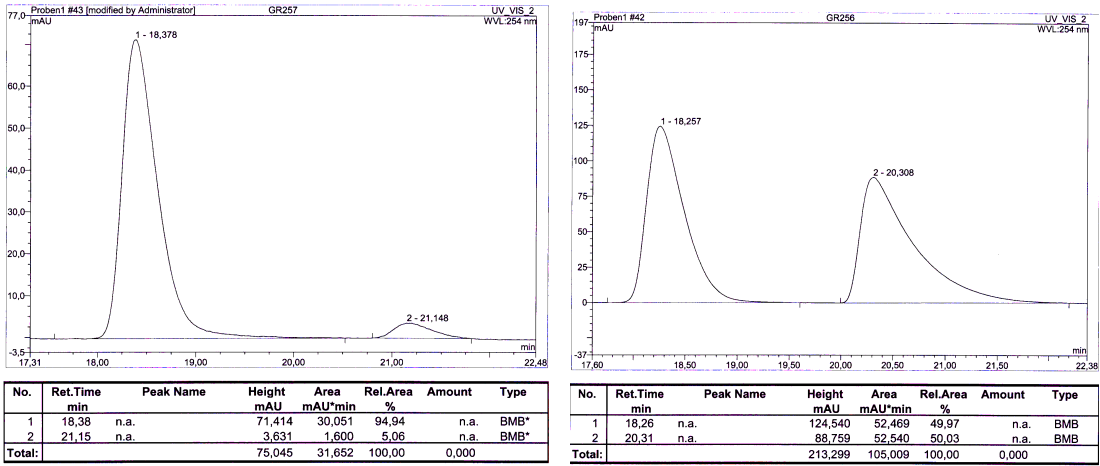



**(S)-3-(2-Fluorophenyl)cyclohexanone (8e):**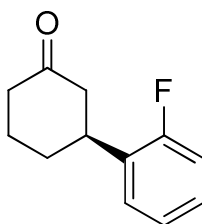**HPLC Data:**

Chiralcel AD; *n*-heptane : *i*-propanol 99.5:0.5; flow: 1.0 mL/min

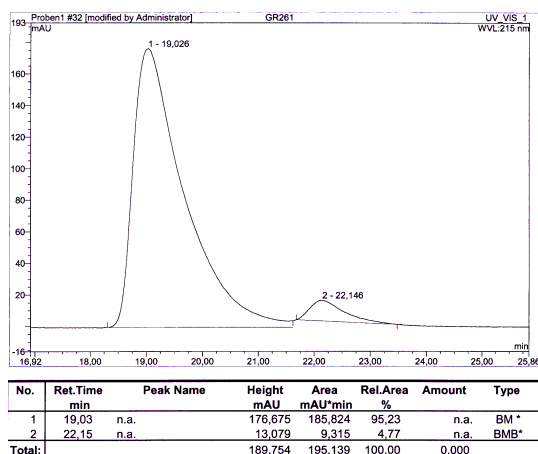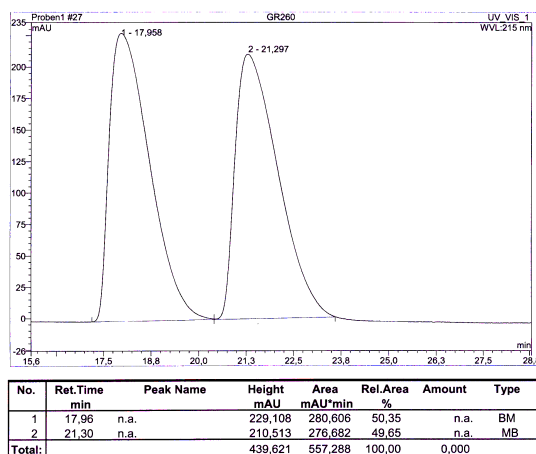**(S)-3-(3-Methoxyphenyl)cyclohexanone (8g):**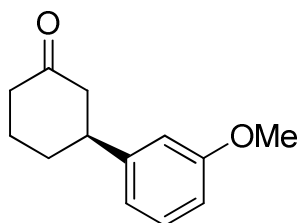**HPLC Data:**

Chiralcel OD-H; *n*-heptane : *i*-propanol 99:1; flow: 1.0 mL/min

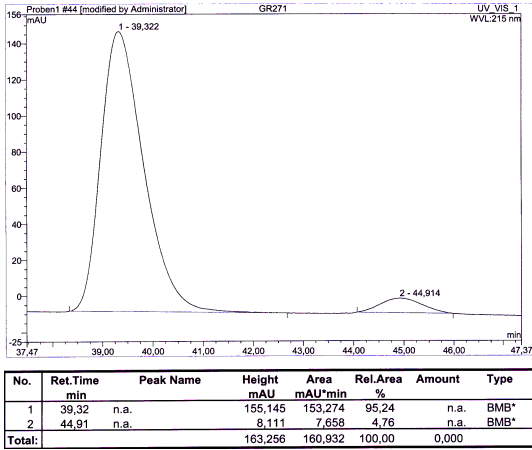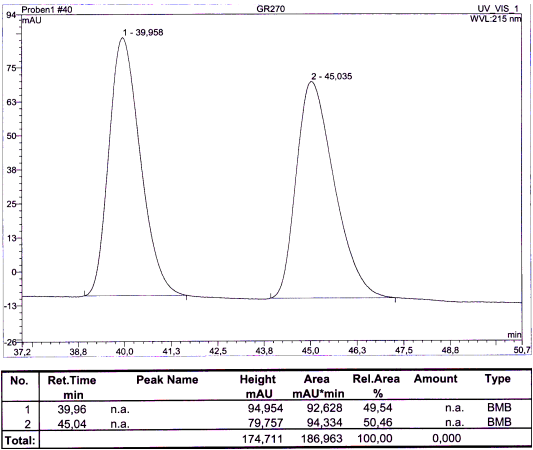

(S)-3-(3-Chlorophenyl)cyclohexanone (8h):

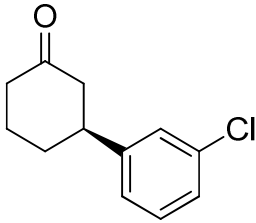

HPLC Data:

Chiralcel OD-H; *n*-heptane : *i*-propanol 99.5:0.5; flow: 0.5 mL/min

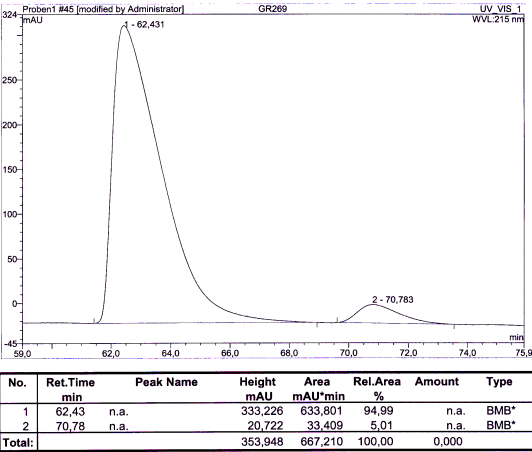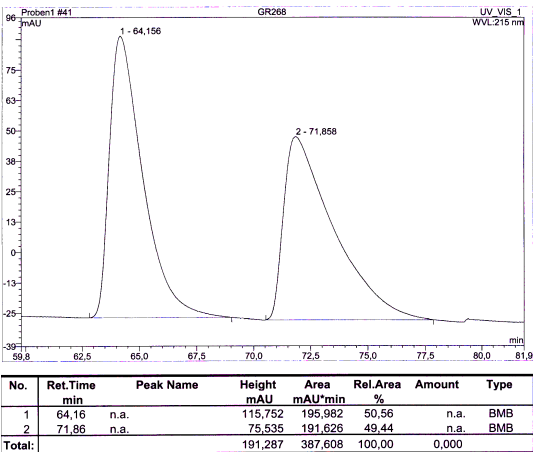

**(S)-3-(4-Methoxyphenyl)cyclohexanone (8i):**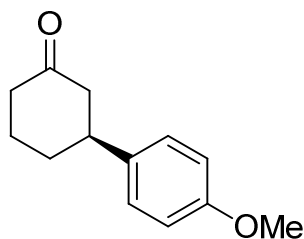**HPLC Data:**

Chiralcel AD-H; *n*-heptane : *i*-propanol 98:2; flow: 0.5 mL/min

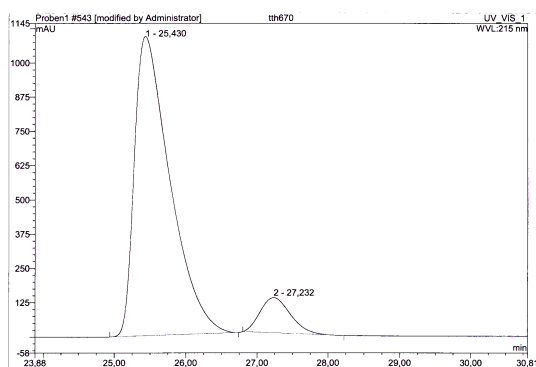

| No.    | Ret.Time<br>min | Peak Name | Height<br>mAU | Area<br>mAU*min | Rel.Area<br>% | Amount | Type |
|--------|-----------------|-----------|---------------|-----------------|---------------|--------|------|
| 1      | 25.43           | n.a.      | 1091,691      | 628,811         | 90,85         | n.a.   | BMB* |
| 2      | 27.23           | n.a.      | 128,261       | 63,300          | 9,15          | n.a.   | BMB* |
| Total: |                 |           | 1219,953      | 692,110         | 100,00        | 0,000  |      |

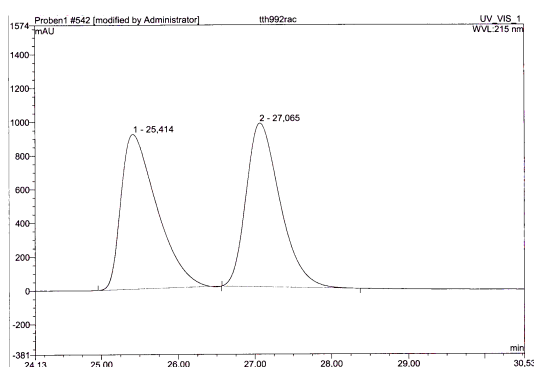

| No.    | Ret.Time<br>min | Peak Name | Height<br>mAU | Area<br>mAU*min | Rel.Area<br>% | Amount | Type |
|--------|-----------------|-----------|---------------|-----------------|---------------|--------|------|
| 1      | 25.41           | n.a.      | 917,254       | 493,341         | 49,75         | n.a.   | BMB* |
| 2      | 27.06           | n.a.      | 968,955       | 498,386         | 50,25         | n.a.   | BMB* |
| Total: |                 |           | 1886,209      | 991,727         | 100,00        | 0,000  |      |

**(S)-3-(4-Chlorophenyl)cyclohexanone (8k):**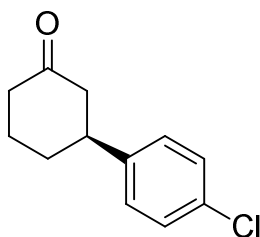**HPLC Data:**

Chiralcel OJ; *n*-heptane : *i*-propanol 99:1; flow: 0.5 mL/min

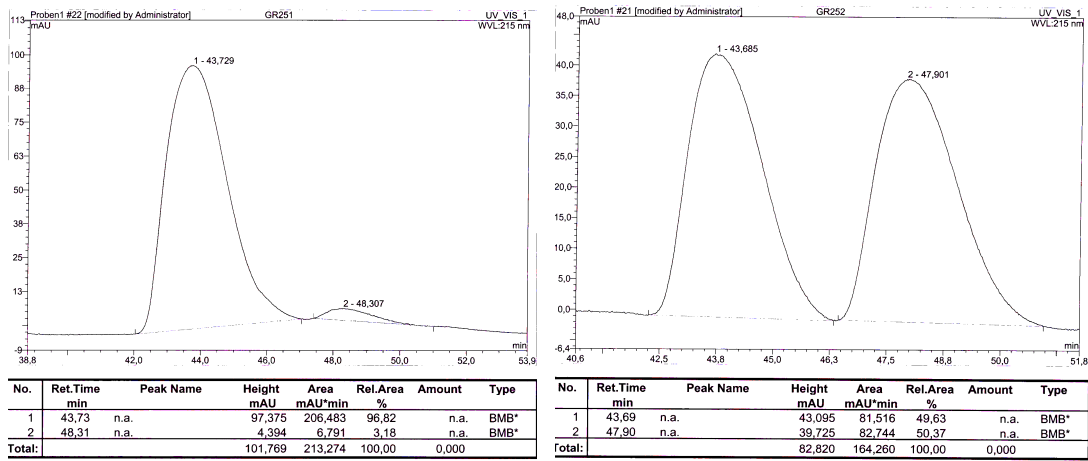

(S)-3-(4-Fluorophenyl)cyclohexanone (81):

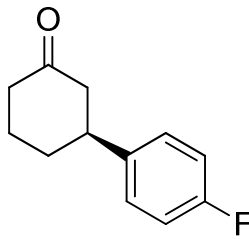

HPLC Data:

Chiralcel AD; *n*-heptane : *i*-propanol 99:1; flow: 1.0 mL/min

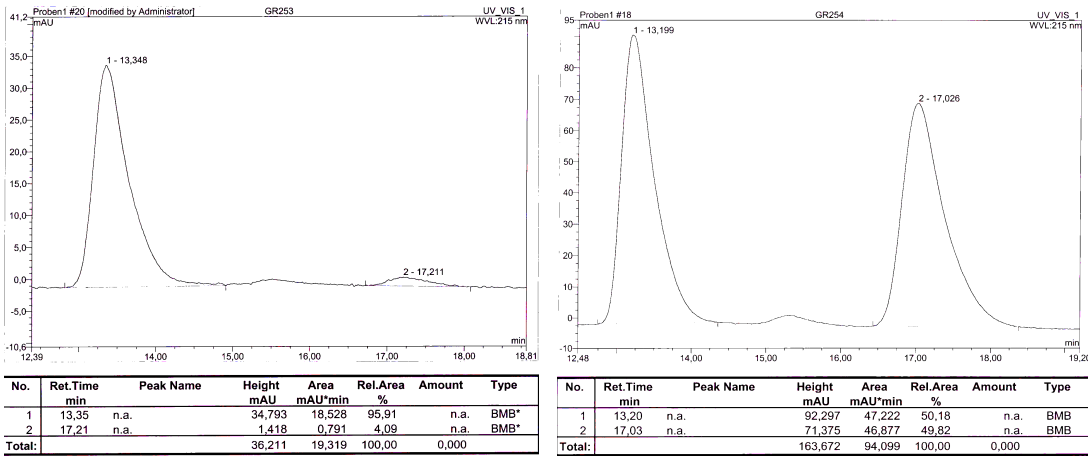

**(S)-3-(4-(Trifluoromethyl)phenyl)cyclohexanone (8m):**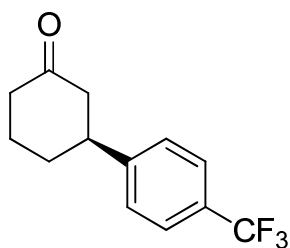**HPLC Data:**

Chiralcel OD-H; *n*-heptane : *i*-propanol 90:10; flow: 0.5 mL/min

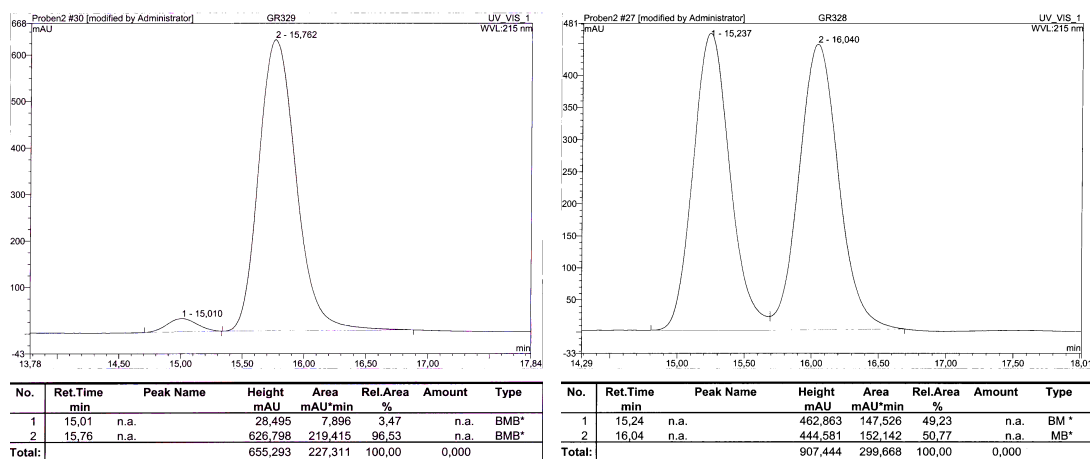**(S,E)-3-Styrylcyclohexanone (8n):**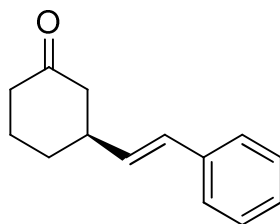**HPLC Data:**

Chiralcel OD-H; *n*-heptane : *i*-propanol 98:2; flow: 1.0 mL/min

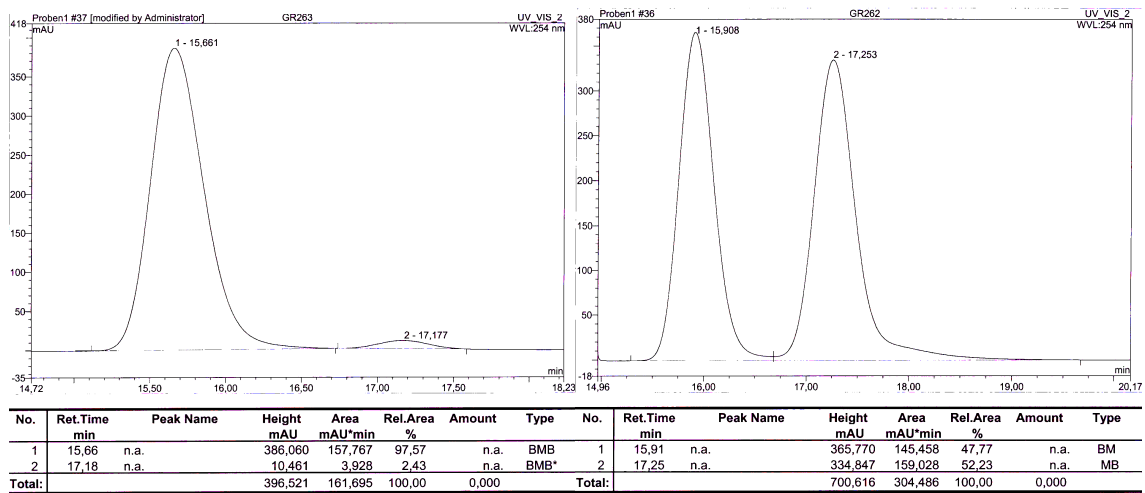

(*S,E*)-3-(4-Methylstyryl)cyclohexanone (8o):

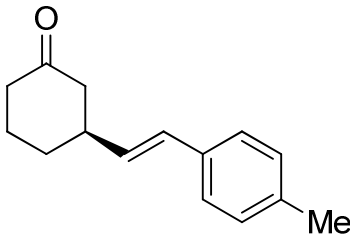

HPLC Data:

Chiralcel OD-H; *n*-heptane : *i*-propanol 99:1; flow: 1.0 mL/min

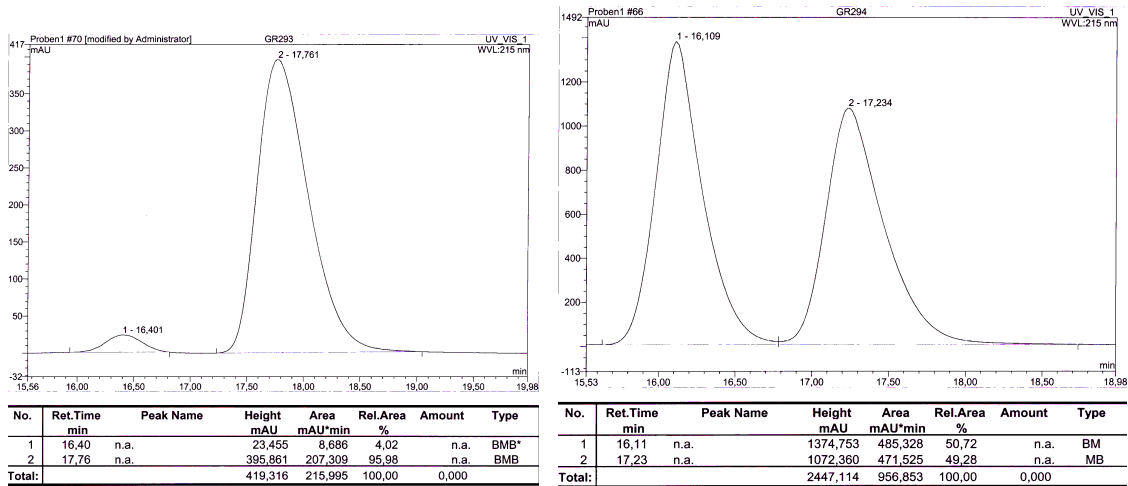

**(S)-3-Phenylcyclopentanone (9a):**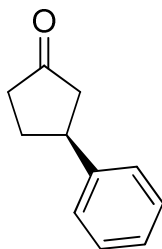**HPLC Data:**

Chiralcel OB-H; *n*-heptane : *i*-propanol 99:1; flow: 0.5 mL/min

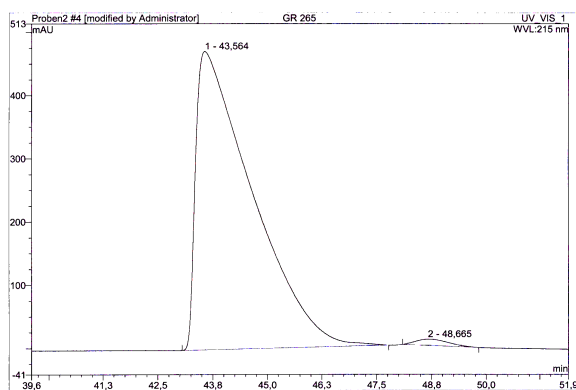

| No.    | Ret.Time<br>min | Peak Name | Height<br>mAU | Area<br>mAU*min | Rel.Area<br>% | Amount | Type |
|--------|-----------------|-----------|---------------|-----------------|---------------|--------|------|
| 1      | 43.56           | n.a.      | 472,239       | 706,999         | 98,81         | n.a.   | BMB* |
| 2      | 48.66           | n.a.      | 9,977         | 8,500           | 1,19          | n.a.   | BMB* |
| Total: |                 |           | 482,216       | 715,499         | 100,00        | 0,000  |      |

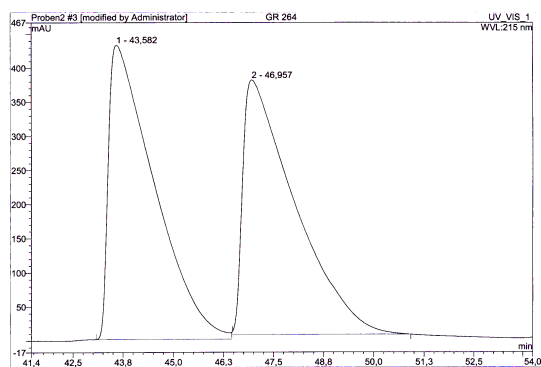

| No.    | Ret.Time<br>min | Peak Name | Height<br>mAU | Area<br>mAU*min | Rel.Area<br>% | Amount | Type |
|--------|-----------------|-----------|---------------|-----------------|---------------|--------|------|
| 1      | 43.56           | n.a.      | 431,683       | 567,373         | 50,17         | n.a.   | BM * |
| 2      | 46.96           | n.a.      | 373,334       | 563,512         | 49,83         | n.a.   | MB*  |
| Total: |                 |           | 805,016       | 1130,885        | 100,00        | 0,000  |      |

**(S)-3-(Naphthalen-1-yl)cyclopentanone (9b):**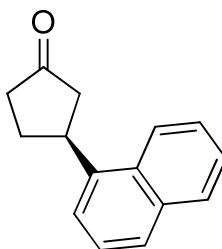**HPLC Data:**

Chiralcel AS-H; *n*-heptane : *i*-propanol 80:20; flow: 0.7 mL/min

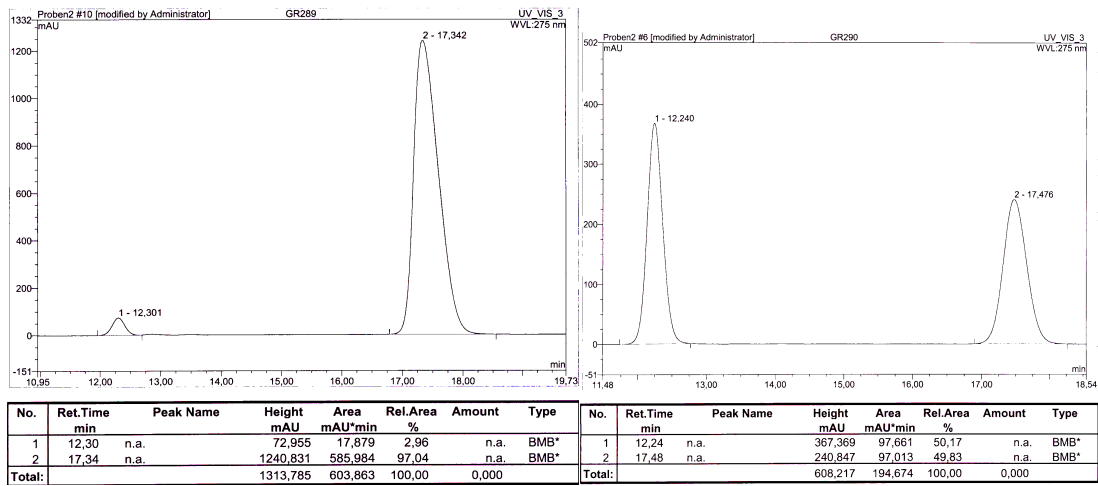

(S)-3-(2-Methoxyphenyl)cyclopentanone (9c):

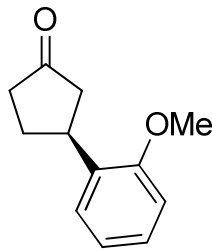

HPLC Data:

Chiralcel OB-H; *n*-heptane : *i*-propanol 90:10; flow: 0.7 mL/min

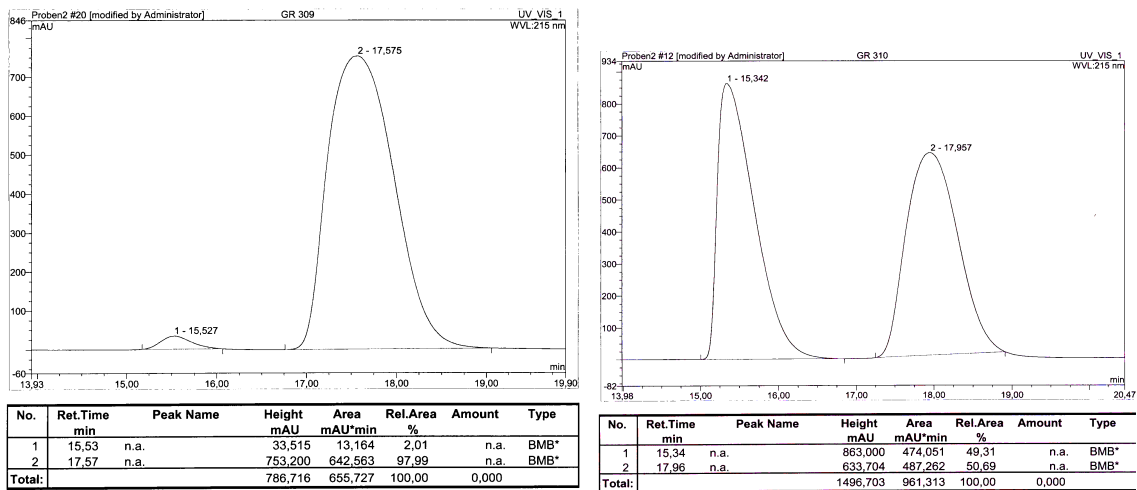



**(S)-3-(3-Chlorophenyl)cyclopentanone (9d):**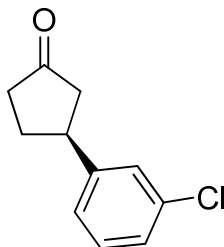**HPLC Data:**

Chiralcel OB-H; *n*-heptane : *i*-propanol 90:10; flow: 0.7 mL/min

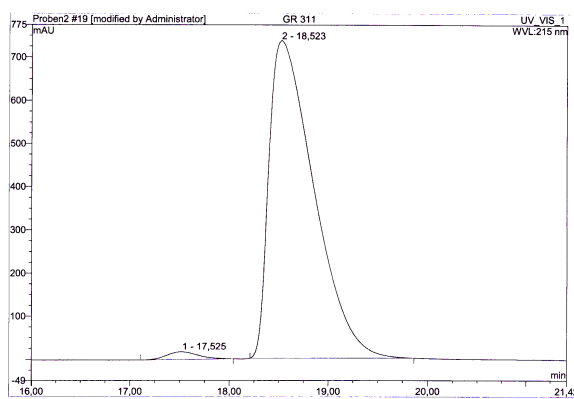

| No.           | Ret.Time<br>min | Peak Name | Height<br>mAU | Area<br>mAU*min | Rel.Area<br>% | Amount | Type |
|---------------|-----------------|-----------|---------------|-----------------|---------------|--------|------|
| 1             | 17,52           | n.a.      | 17,980        | 6,466           | 1,64          | n.a.   | BMB* |
| 2             | 18,52           | n.a.      | 735,924       | 388,524         | 98,36         | n.a.   | BMB* |
| <b>Total:</b> |                 |           | 753,804       | 394,990         | 100,00        | 0,000  |      |

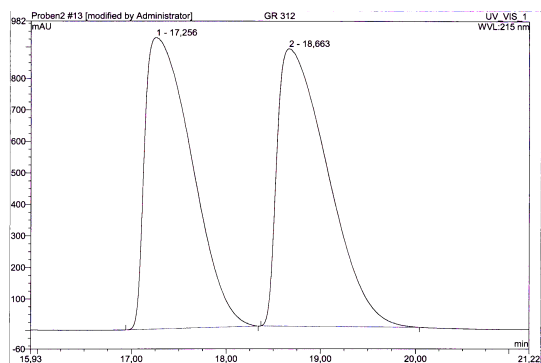

| No.           | Ret.Time<br>min | Peak Name | Height<br>mAU | Area<br>mAU*min | Rel.Area<br>% | Amount | Type |
|---------------|-----------------|-----------|---------------|-----------------|---------------|--------|------|
| 1             | 17,26           | n.a.      | 926,337       | 530,386         | 49,20         | n.a.   | BMB* |
| 2             | 18,66           | n.a.      | 881,861       | 547,564         | 50,80         | n.a.   | BMB* |
| <b>Total:</b> |                 |           | 1808,198      | 1077,950        | 100,00        | 0,000  |      |

**(S)-3-(4-Methoxyphenyl)cyclopentanone (9e):**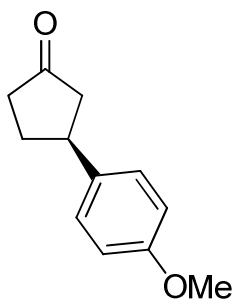**HPLC Data:**

Chiralcel OD-H; *n*-heptane : *i*-propanol 95:5; flow: 0.5 mL/min

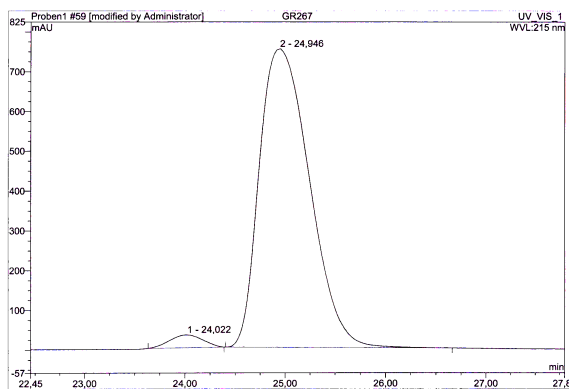

| No.    | Ret.Time<br>min | Peak Name | Height<br>mAU | Area<br>mAU*min | Rel.Area<br>% | Amount | Type |
|--------|-----------------|-----------|---------------|-----------------|---------------|--------|------|
| 1      | 24.02           | n.a.      | 32,131        | 12,270          | 2.73          | n.a.   | BMB* |
| 2      | 24.95           | n.a.      | 750,315       | 437,335         | 97.27         | n.a.   | BMB* |
| Total: |                 |           | 782,446       | 449,605         | 100.00        | 0.000  |      |

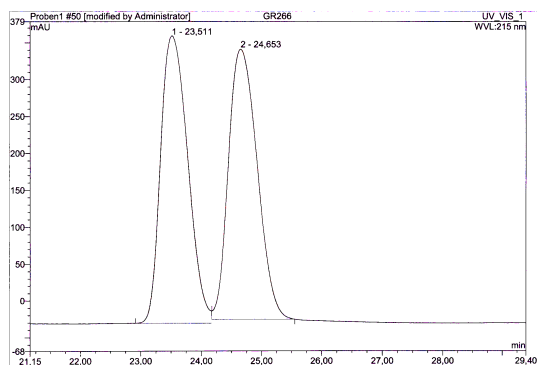

| No.    | Ret.Time<br>min | Peak Name | Height<br>mAU | Area<br>mAU*min | Rel.Area<br>% | Amount | Type |
|--------|-----------------|-----------|---------------|-----------------|---------------|--------|------|
| 1      | 23.51           | n.a.      | 390,167       | 202,315         | 49.89         | n.a.   | BM*  |
| 2      | 24.65           | n.a.      | 366,642       | 203,230         | 50.11         | n.a.   | MB*  |
| Total: |                 |           | 756,809       | 405,545         | 100.00        | 0.000  |      |

(S)-3-(p-Tolyl)cyclopentanone (9f):

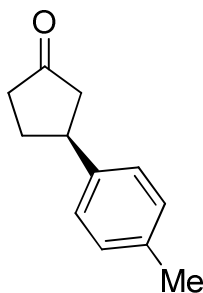

HPLC Data:

Chiralcel OB-H; *n*-heptane : *i*-propanol 95:5; flow: 0.7 mL/min

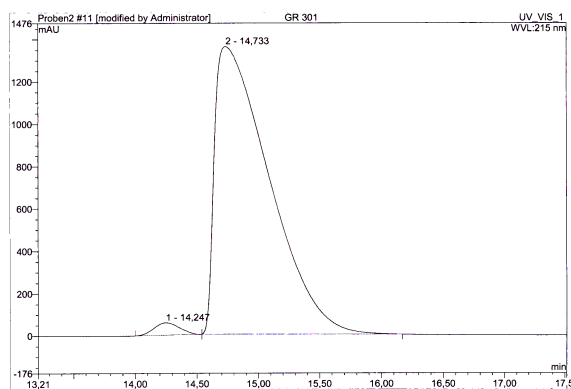

| No.    | Ret.Time<br>min | Peak Name | Height<br>mAU | Area<br>mAU*min | Rel.Area<br>% | Amount | Type |
|--------|-----------------|-----------|---------------|-----------------|---------------|--------|------|
| 1      | 14.25           | n.a.      | 58,582        | 13,882          | 1.94          | n.a.   | BMB* |
| 2      | 14.73           | n.a.      | 1359,642      | 701,284         | 98.06         | n.a.   | BMB* |
| Total: |                 |           | 1418,223      | 715,166         | 100.00        | 0.000  |      |

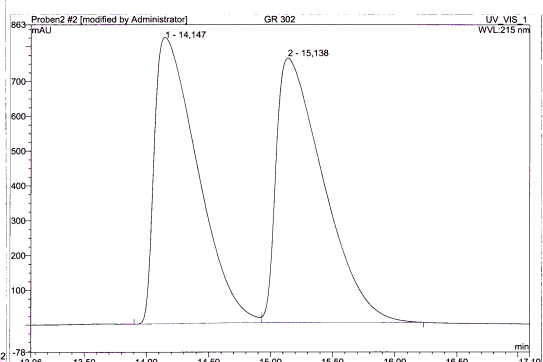

| No.    | Ret.Time<br>min | Peak Name | Height<br>mAU | Area<br>mAU*min | Rel.Area<br>% | Amount | Type |
|--------|-----------------|-----------|---------------|-----------------|---------------|--------|------|
| 1      | 14.15           | n.a.      | 823,557       | 329,626         | 49.49         | n.a.   | BM*  |
| 2      | 15.14           | n.a.      | 760,584       | 336,375         | 50.51         | n.a.   | MB*  |
| Total: |                 |           | 1584,142      | 666,002         | 100.00        | 0.000  |      |

**(S)-3-(4-Chlorophenyl)cyclopentanone (9g):**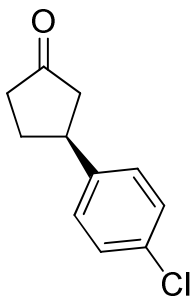**HPLC Data:**

Chiralcel OB-H; *n*-heptane : *i*-propanol 90:10; flow: 0.5 mL/min

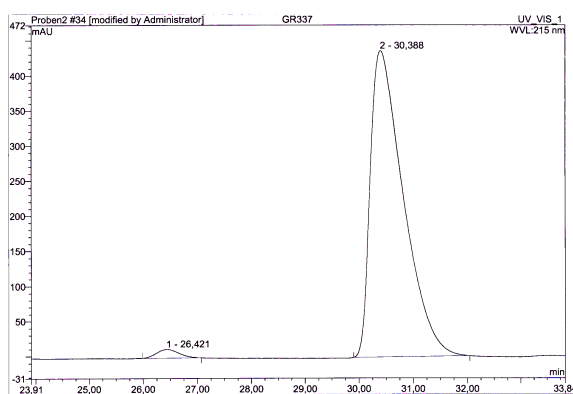

| No.    | Ret.Time<br>min | Peak Name | Height<br>mAU | Area<br>mAU*min | Rel.Area<br>% | Amount | Type |
|--------|-----------------|-----------|---------------|-----------------|---------------|--------|------|
| 1      | 26.42           | n.a.      | 12.359        | 5.858           | 1.87          | n.a.   | BMB* |
| 2      | 30.39           | n.a.      | 436.689       | 307.479         | 98.13         | n.a.   | BMB* |
| Total: |                 |           | 449.048       | 313.337         | 100.00        | 0.000  |      |

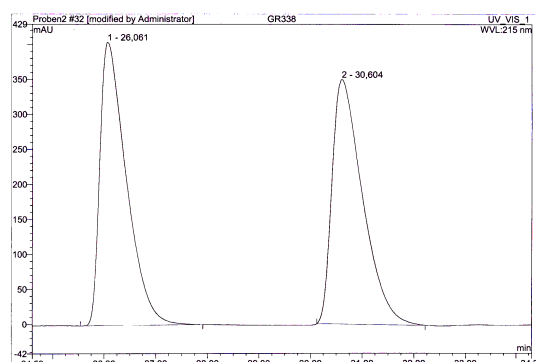

| No.    | Ret.Time<br>min | Peak Name | Height<br>mAU | Area<br>mAU*min | Rel.Area<br>% | Amount | Type |
|--------|-----------------|-----------|---------------|-----------------|---------------|--------|------|
| 1      | 26.06           | n.a.      | 404.686       | 239.906         | 50.15         | n.a.   | BMB* |
| 2      | 30.60           | n.a.      | 349.416       | 238.456         | 49.85         | n.a.   | BMB* |
| Total: |                 |           | 754.102       | 478.361         | 100.00        | 0.000  |      |

**(S)-3-(4-(Trifluoromethyl)phenyl)cyclopentanone (9h):**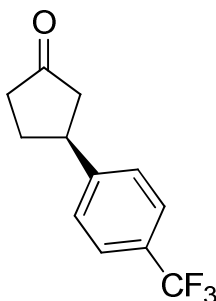**HPLC Data:**

Chiralcel OB-H; *n*-heptane : *i*-propanol 90:10; flow: 0.5 mL/min

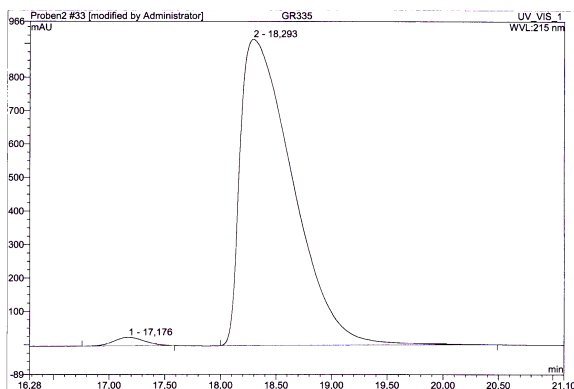

| No.    | Ret.Time<br>min | Peak Name | Height<br>mAU | Area<br>mAU*min | Rel.Area<br>% | Amount | Type |
|--------|-----------------|-----------|---------------|-----------------|---------------|--------|------|
| 1      | 17,18           | n.a.      | 25,432        | 8,060           | 1,58          | n.a.   | BMB* |
| 2      | 18,29           | n.a.      | 915,354       | 501,940         | 98,42         | n.a.   | BMB* |
| Total: |                 |           | 940,786       | 510,000         | 100,00        | 0,000  |      |

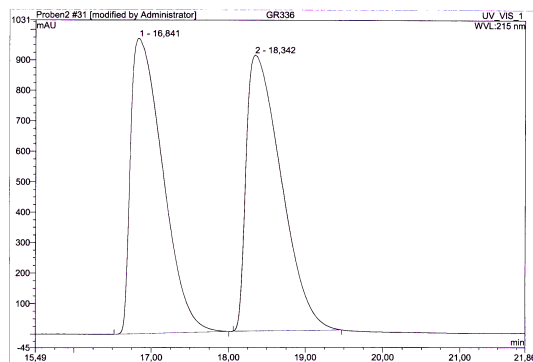

| No.    | Ret.Time<br>min | Peak Name | Height<br>mAU | Area<br>mAU*min | Rel.Area<br>% | Amount | Type |
|--------|-----------------|-----------|---------------|-----------------|---------------|--------|------|
| 1      | 16,84           | n.a.      | 970,380       | 465,800         | 49,35         | n.a.   | BMB* |
| 2      | 18,34           | n.a.      | 906,881       | 478,027         | 50,65         | n.a.   | BMB* |
| Total: |                 |           | 1877,261      | 943,828         | 100,00        | 0,000  |      |

(*S,E*)-3-Styrylcyclopentanone (**9i**):

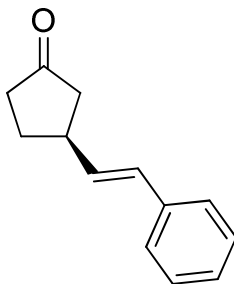

#### HPLC Data:

Chiralcel OD-H; *n*-heptane : *i*-propanol 99:1; flow: 1.0 mL/min

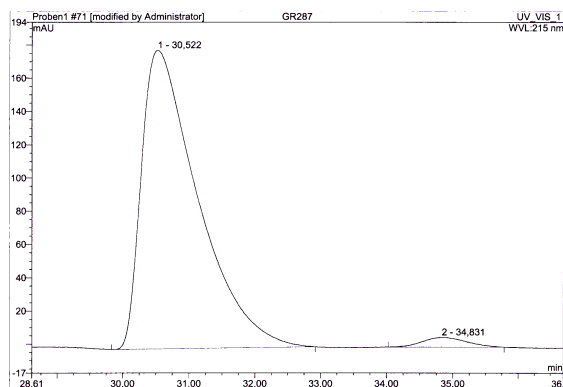

| No.    | Ret.Time<br>min | Peak Name | Height<br>mAU | Area<br>mAU*min | Rel.Area<br>% | Amount | Type |
|--------|-----------------|-----------|---------------|-----------------|---------------|--------|------|
| 1      | 30,52           | n.a.      | 179,790       | 177,514         | 97,53         | n.a.   | BMB* |
| 2      | 34,83           | n.a.      | 5,882         | 4,505           | 2,47          | n.a.   | BMB* |
| Total: |                 |           | 185,672       | 182,018         | 100,00        | 0,000  |      |

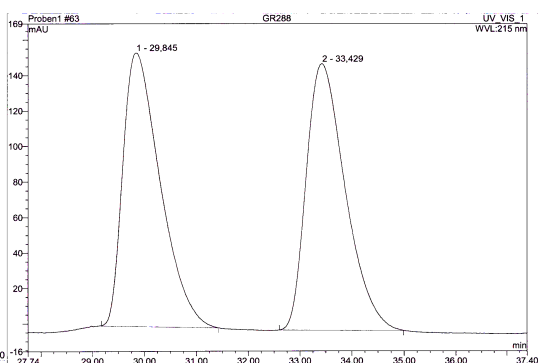

| No.    | Ret.Time<br>min | Peak Name | Height<br>mAU | Area<br>mAU*min | Rel.Area<br>% | Amount | Type |
|--------|-----------------|-----------|---------------|-----------------|---------------|--------|------|
| 1      | 29,85           | n.a.      | 154,272       | 127,953         | 49,44         | n.a.   | BMB  |
| 2      | 33,43           | n.a.      | 150,397       | 130,853         | 50,56         | n.a.   | BMB  |
| Total: |                 |           | 304,670       | 258,806         | 100,00        | 0,000  |      |

**(S)-1-Benzyl-3-phenylpyrrolidine-2,5-dione (10a):**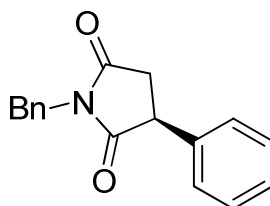**HPLC Data:**

Chiralcel OD-H; *n*-heptane : *i*-propanol 90:10; flow: 1.0 mL/min

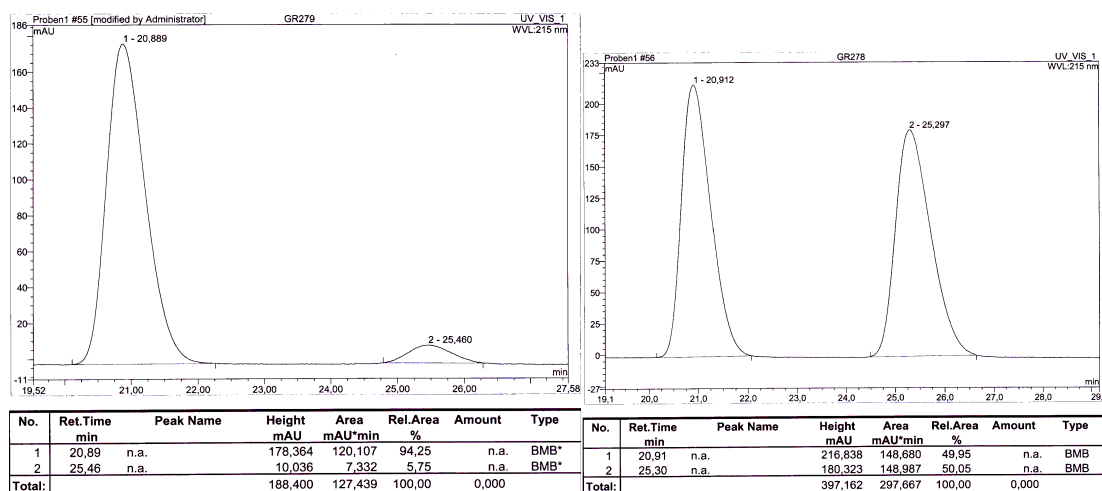**(S)-1-Benzyl-3-(4-methoxyphenyl)pyrrolidine-2,5-dione (10b):**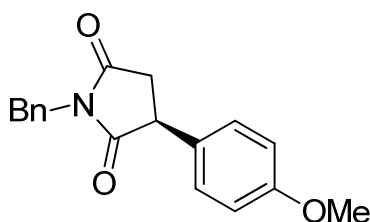**HPLC Data:**

Chiralcel OD-H; *n*-heptane : *i*-propanol 90:10; flow: 1.0 mL/min

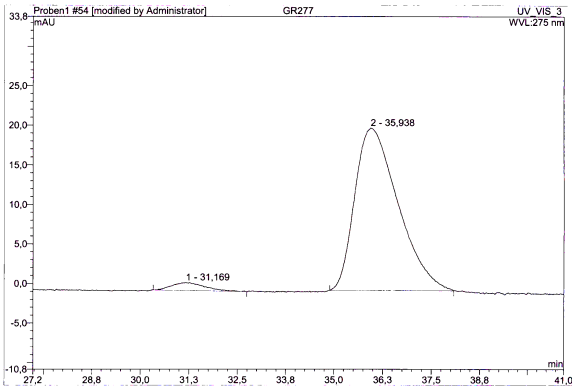

| No.    | Ret.Time<br>min | Peak Name | Height<br>mAU | Area<br>mAU*min | Rel.Area<br>% | Amount | Type |
|--------|-----------------|-----------|---------------|-----------------|---------------|--------|------|
| 1      | 31,17           | n.a.      | 1,012         | 0,983           | 3,58          | n.a.   | BMB* |
| 2      | 35,94           | n.a.      | 20,532        | 26,454          | 96,42         | n.a.   | BMB  |
| Total: |                 |           | 21,545        | 27,438          | 100,00        | 0,000  |      |

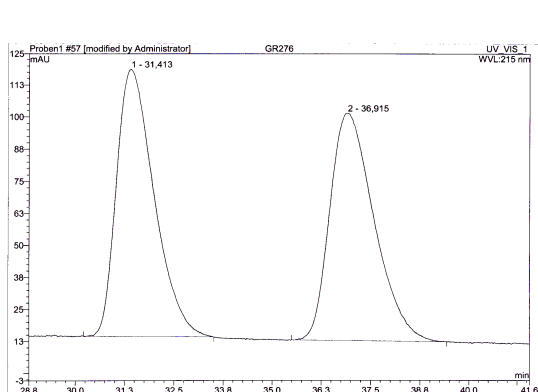

| No.    | Ret.Time<br>min | Peak Name | Height<br>mAU | Area<br>mAU*min | Rel.Area<br>% | Amount | Type |
|--------|-----------------|-----------|---------------|-----------------|---------------|--------|------|
| 1      | 31,41           | n.a.      | 104,246       | 115,257         | 49,98         | n.a.   | BMB* |
| 2      | 36,92           | n.a.      | 88,695        | 115,361         | 50,02         | n.a.   | BMB* |
| Total: |                 |           | 192,940       | 230,618         | 100,00        | 0,000  |      |

(S)-1-Benzyl-3-(3,5-dimethylphenyl)pyrrolidine-2,5-dione

(10c):

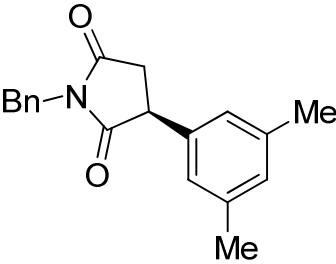

HPLC Data:

Chiralcel AD-H; *n*-heptane : *i*-propanol 95:5; flow: 1.0 mL/min

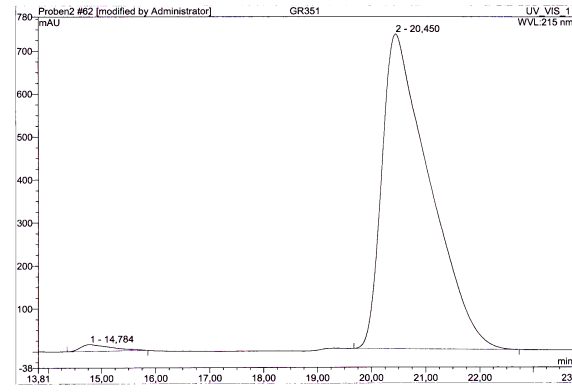

| No.    | Ret.Time<br>min | Peak Name | Height<br>mAU | Area<br>mAU*min | Rel.Area<br>% | Amount | Type |
|--------|-----------------|-----------|---------------|-----------------|---------------|--------|------|
| 1      | 14,78           | n.a.      | 15,824        | 10,576          | 1,40          | n.a.   | BMB* |
| 2      | 20,45           | n.a.      | 734,654       | 746,341         | 98,60         | n.a.   | BMB* |
| Total: |                 |           | 750,478       | 756,917         | 100,00        | 0,000  |      |

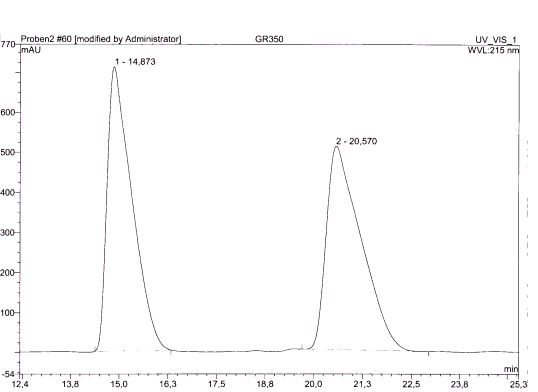

| No.    | Ret.Time<br>min | Peak Name | Height<br>mAU | Area<br>mAU*min | Rel.Area<br>% | Amount | Type |
|--------|-----------------|-----------|---------------|-----------------|---------------|--------|------|
| 1      | 14,87           | n.a.      | 710,604       | 521,982         | 49,93         | n.a.   | BMB* |
| 2      | 20,57           | n.a.      | 509,225       | 523,411         | 50,07         | n.a.   | BMB* |
| Total: |                 |           | 1219,829      | 1045,394        | 100,00        | 0,000  |      |

## Compounds of Table 2

**(*R*)-3-Phenylcyclohexanone (11a):**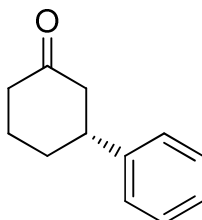**HPLC Data:**

Chiralcel AD; *n*-heptane : *i*-propanol 90:10; flow: 0.3 mL/min

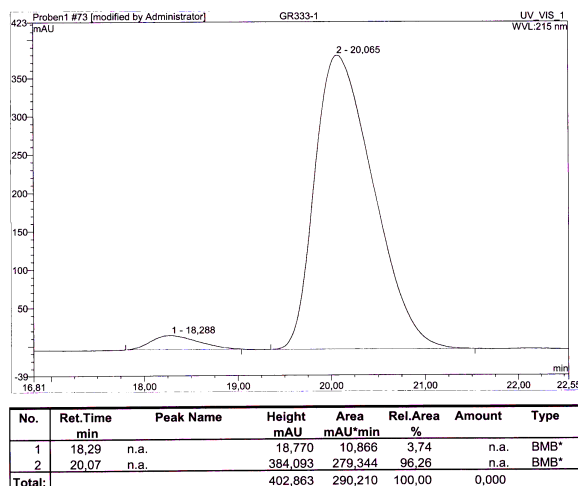**(*R*)-3-(Naphthalen-1-yl)cyclohexanone (11b):**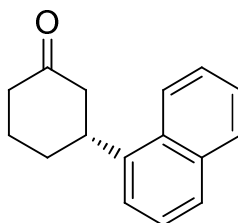**HPLC Data:**

Chiralcel OD-H; *n*-heptane : *i*-propanol 95:5; flow: 0.5 mL/min

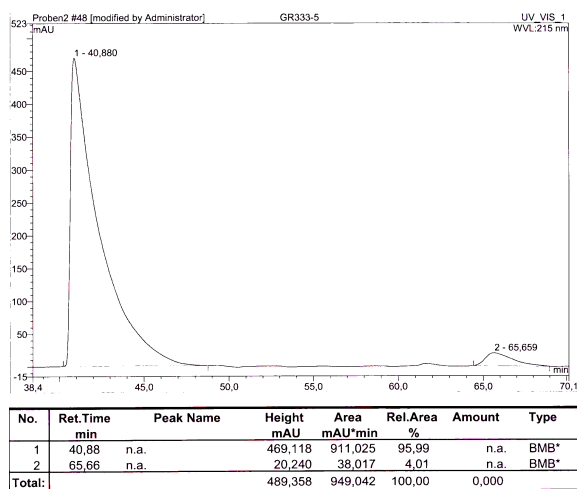

**(R)-3-(4-Methoxyphenyl)cyclohexanone (11c):**

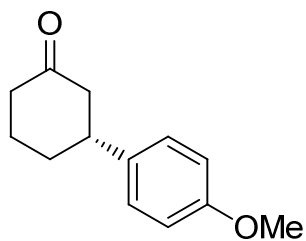

#### HPLC Data:

Chiralcel AD-H; *n*-heptane : *i*-propanol 98:2; flow: 0.5 mL/min

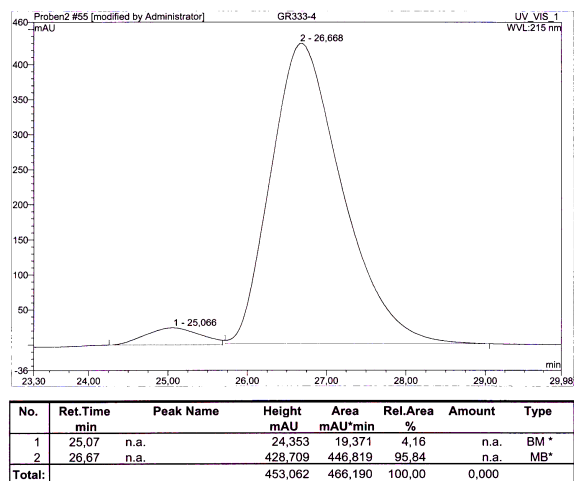

Supplement: Supplementary file 1 [file 4293070]
